# Supplementary material for: CoSWAT-WQ v1.0: a high-resolution community global SWAT+ water quality model
Source: Copernicus journal article supplement (doi:10.5194/egusphere-2025-703), 2025-02-24

**CoSWAT-WQ v1.0: a high-resolution community global SWATplus water quality model**

Albert Nkwasa1,2, Celray James Chawanda2,3, Maria Theresa Nakkazi1, Ann van Griensven2,4

1 Water Security Research Group, Biodiversity and Natural Resources Program, International Institute for Applied Systems Analysis (IIASA), Schlossplatz 1, A-2361, Laxenburg, Austria

2 Department of Water and Climate, Vrije Universiteit Brussel (VUB), 1050 Brussel, Belgium

3 Texas A&M AgriLife Research, Blackland Research & Extension Center, Temple, TX 76502, USA

4 Water Science & Engineering Department, IHE Delft Institute for Water Education, 2611 AX Delft, The Netherlands

*Corresponding author: Albert Nkwasa ([nkwasa@iiasa.ac.at](mailto:nkwasa@iiasa.ac.at))

**S1: Time series for observed and simulated river concentrations for TN**

Note that the station IDs correspond to the IDs used in the Global Environment Monitoring System for Freshwater (GEMS/Water) database (GEMStat), a prominent repository of in-situ freshwater quality measurements. The station IDs and the corresponding station name and country of location are in Supplementary Material B.


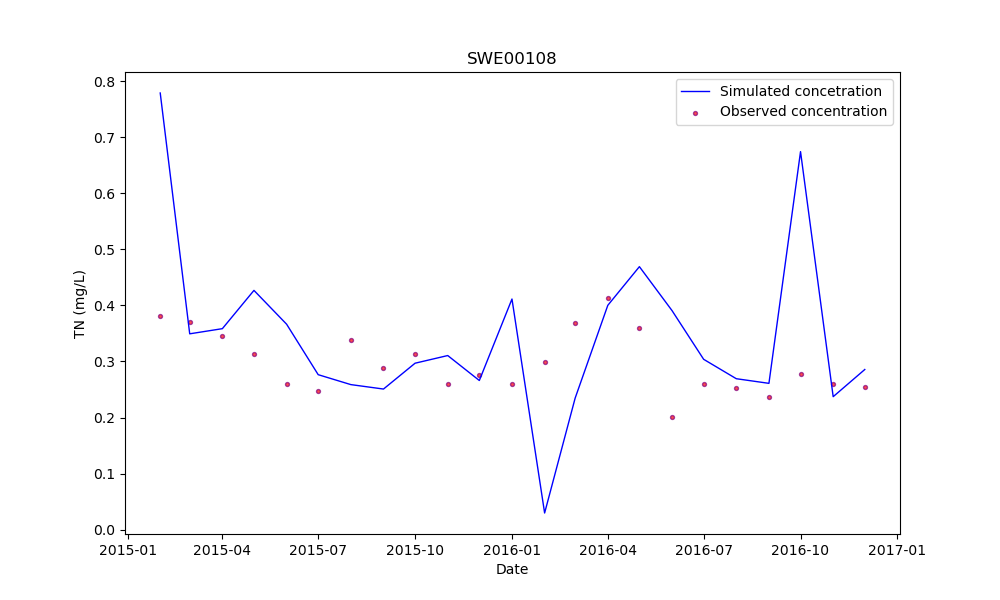


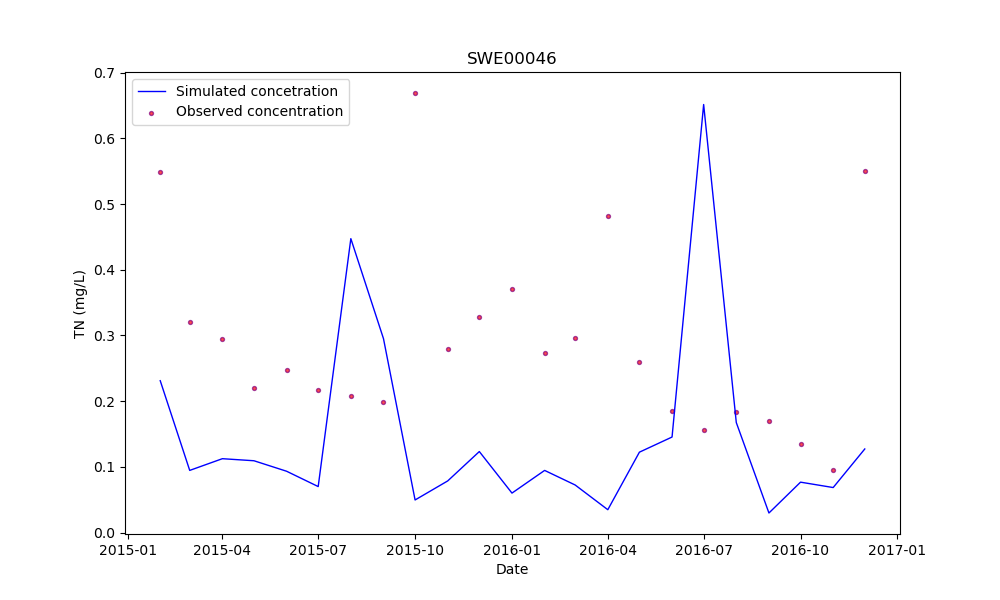


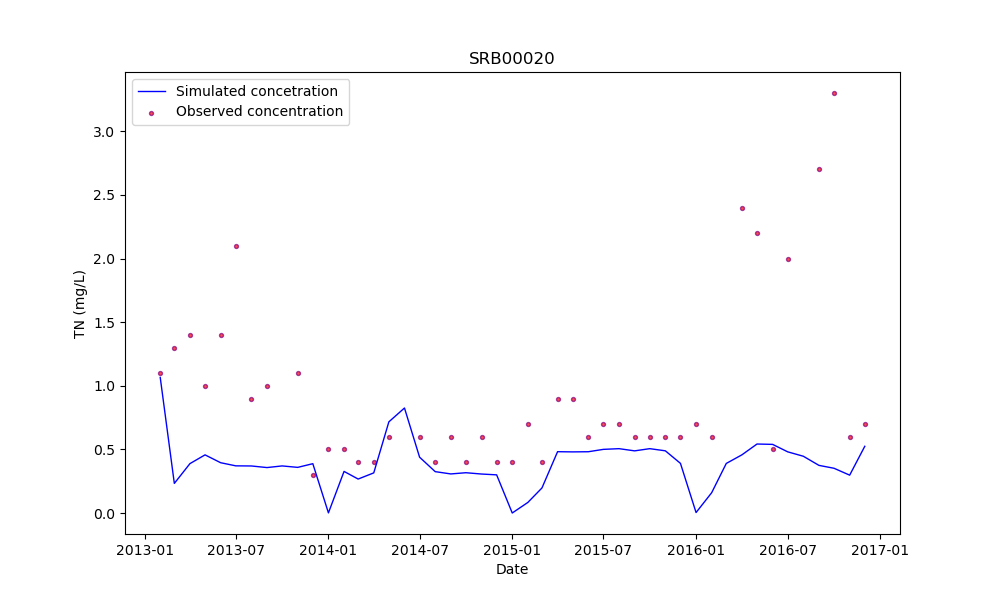


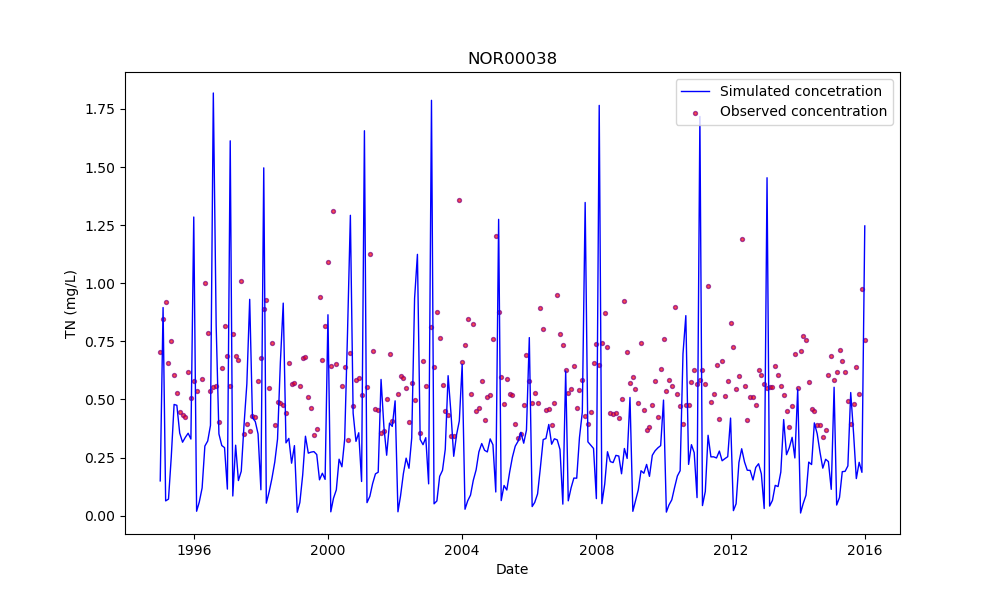


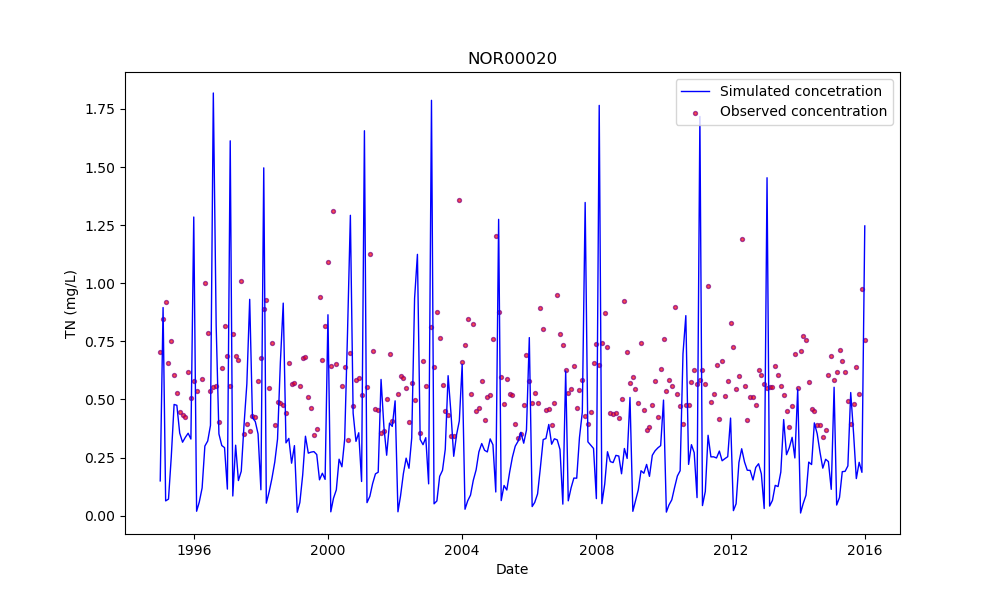


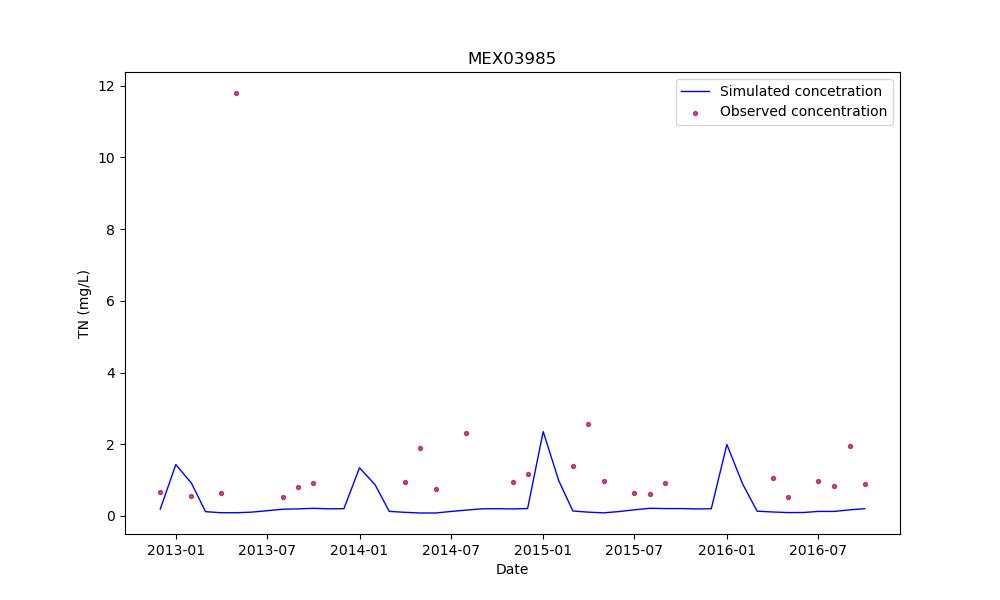


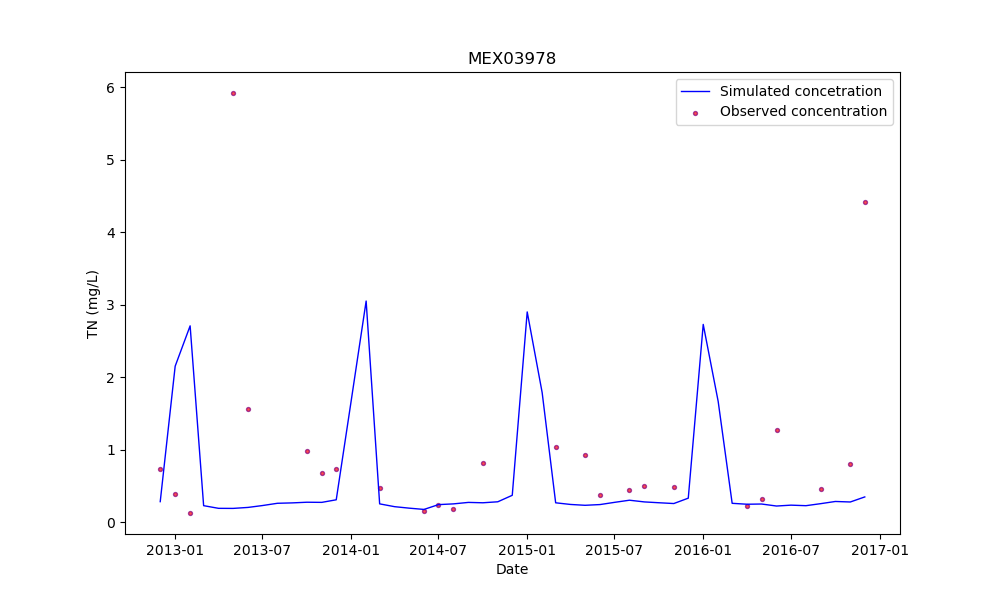


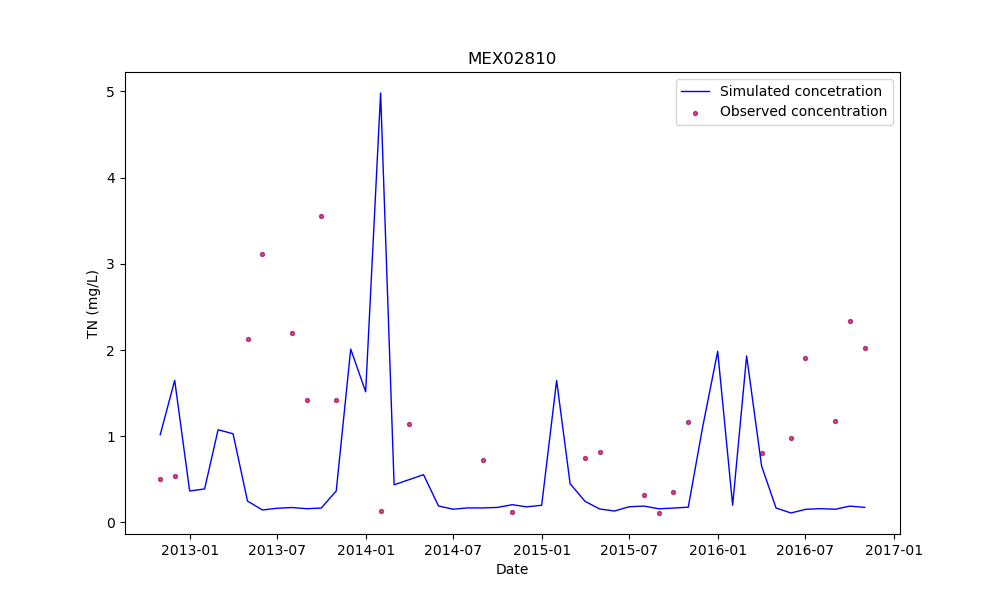


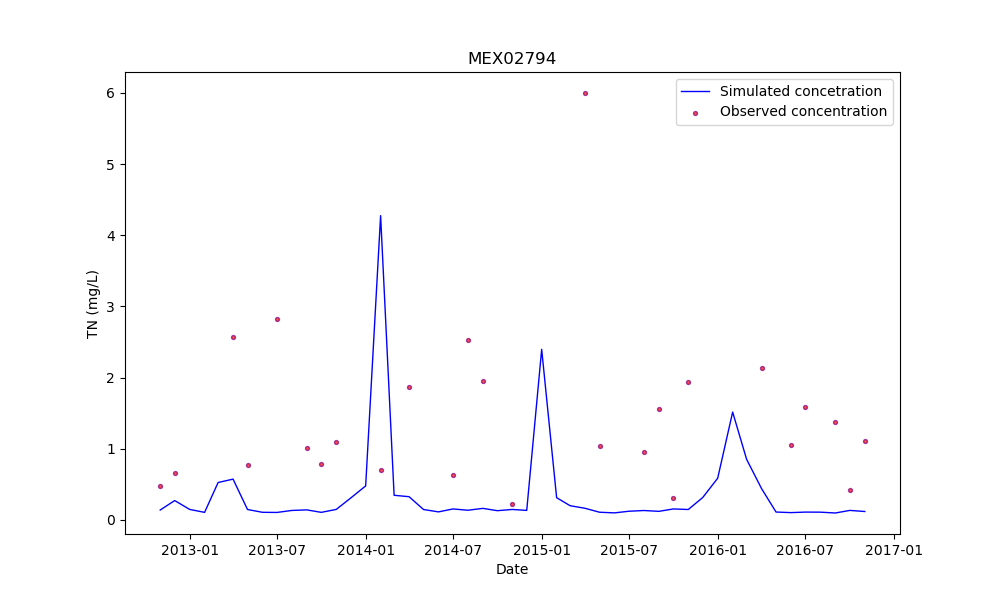


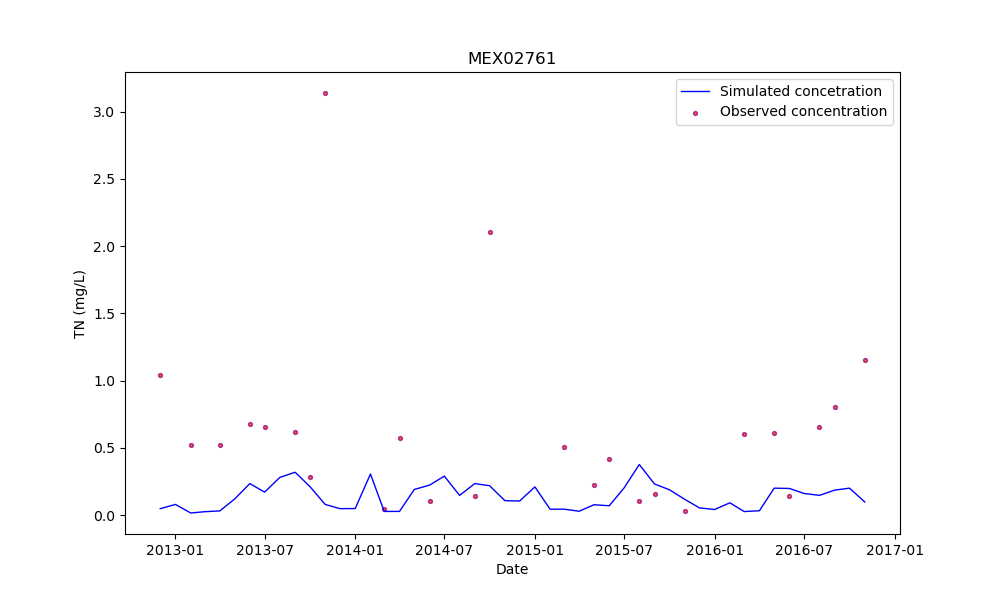


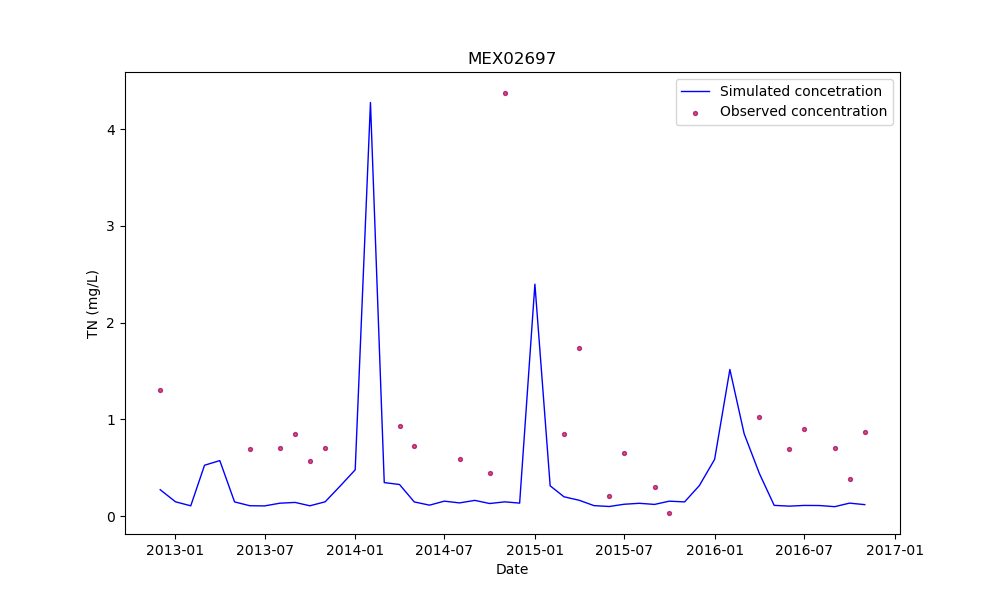


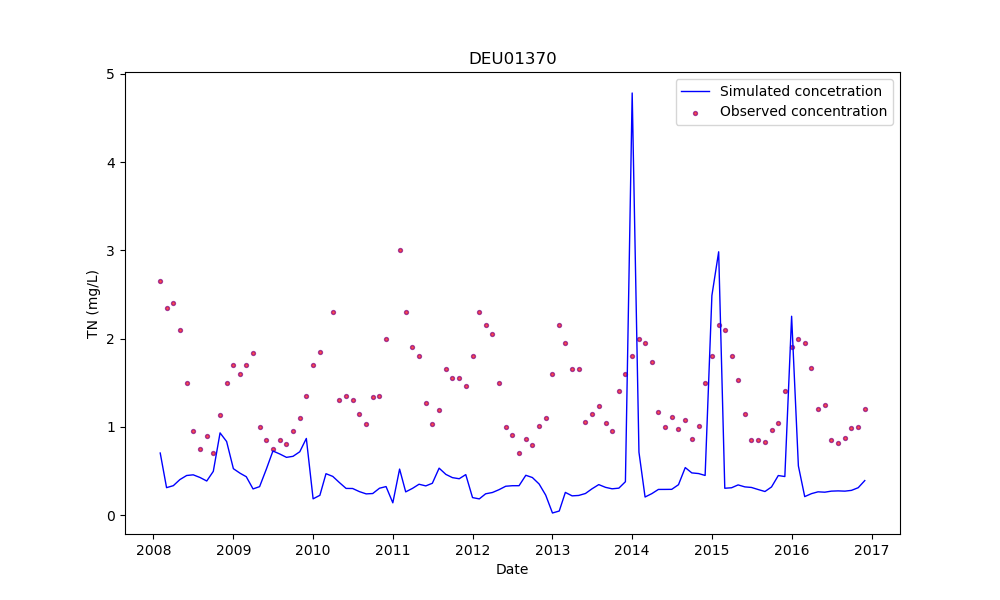


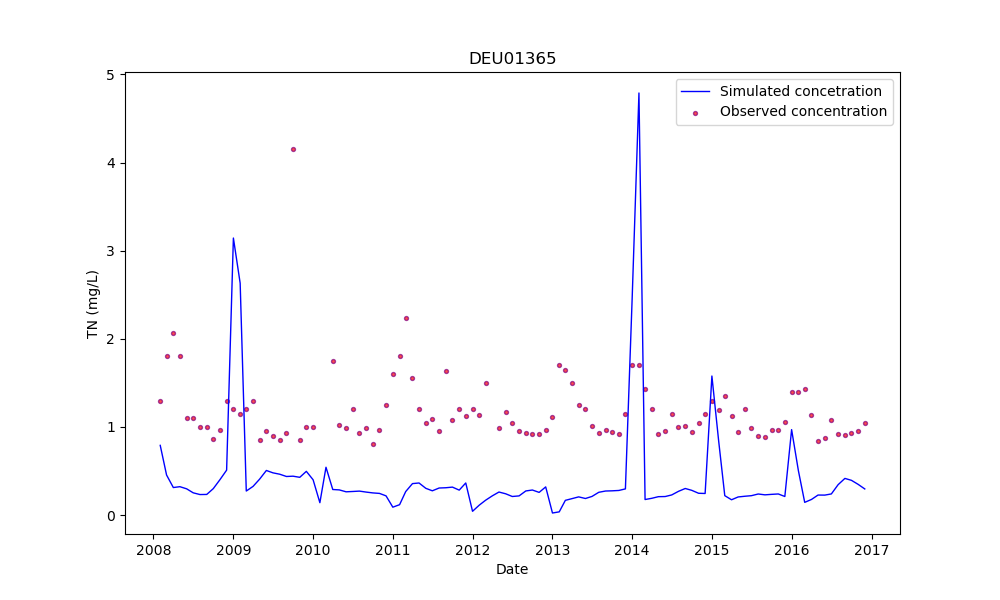


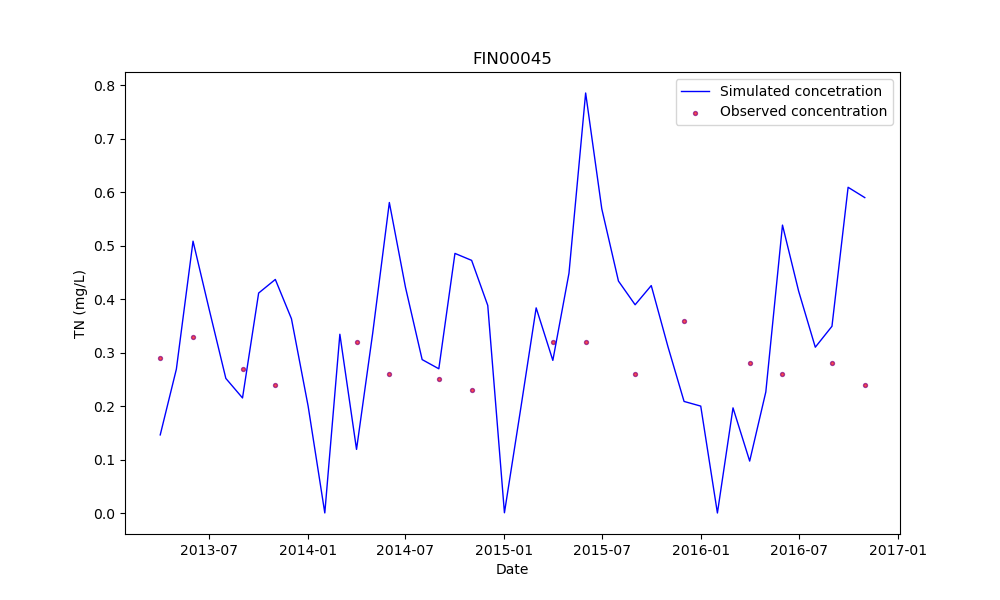


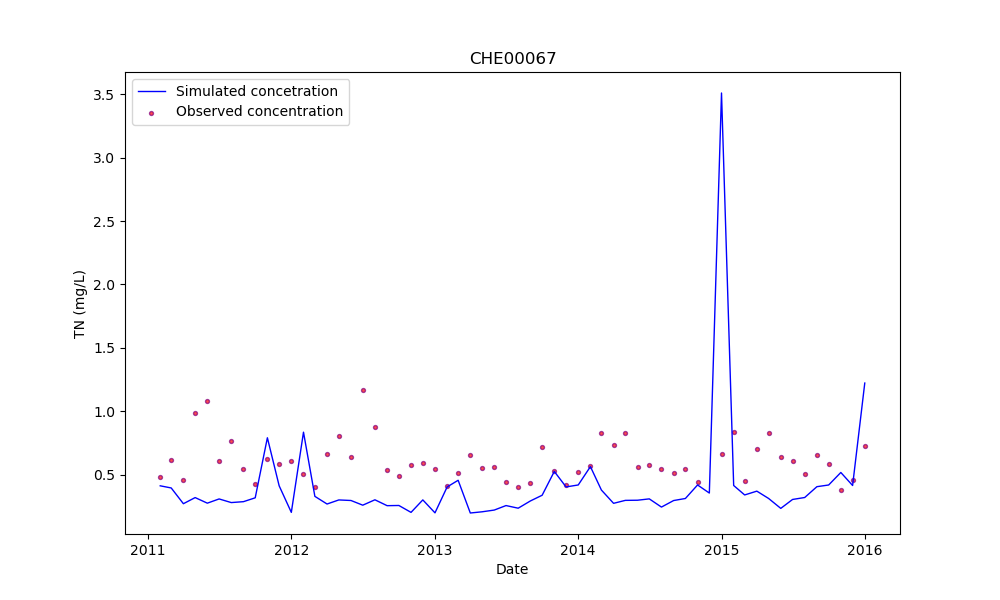


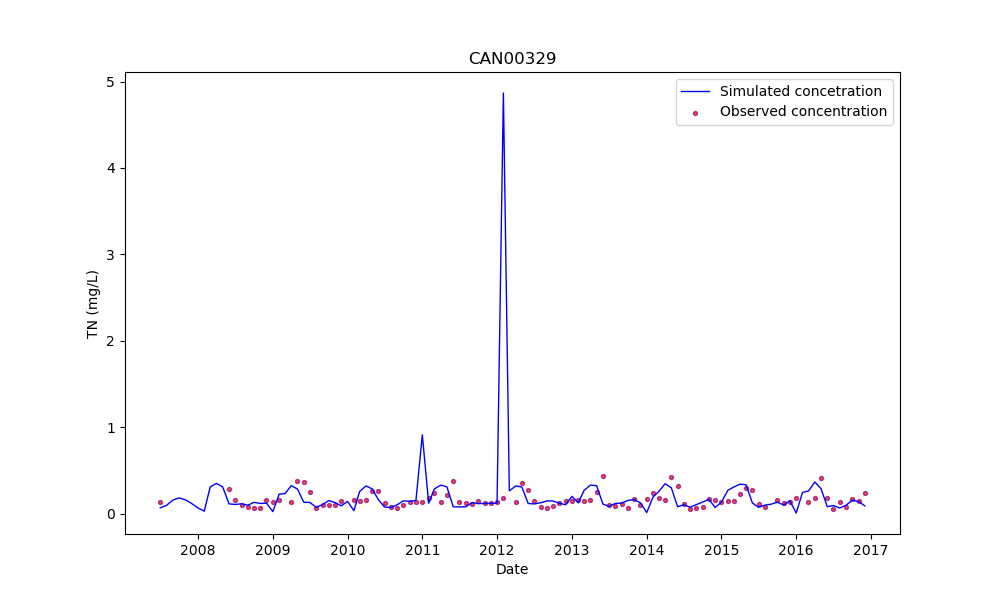


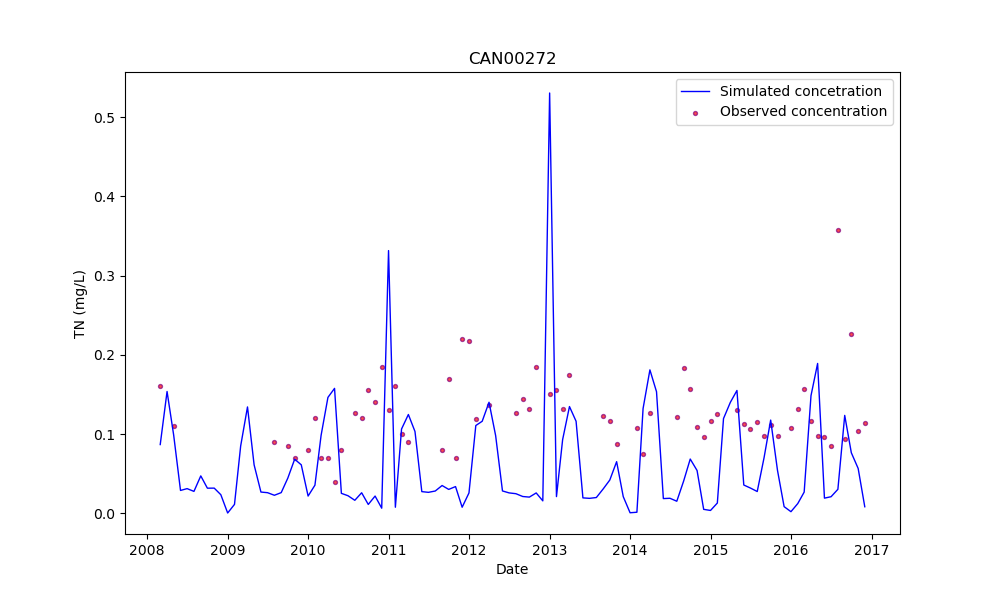


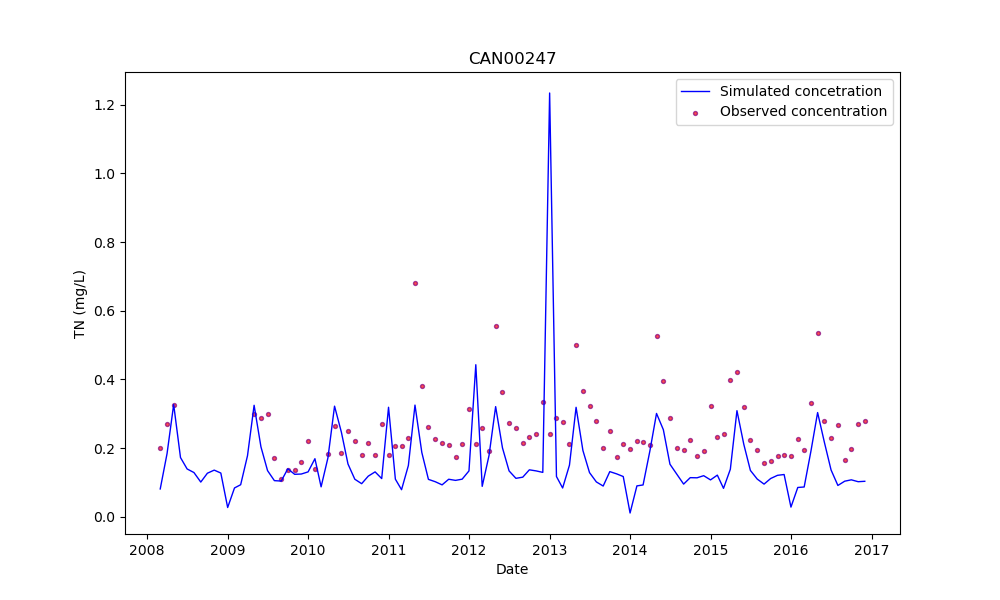


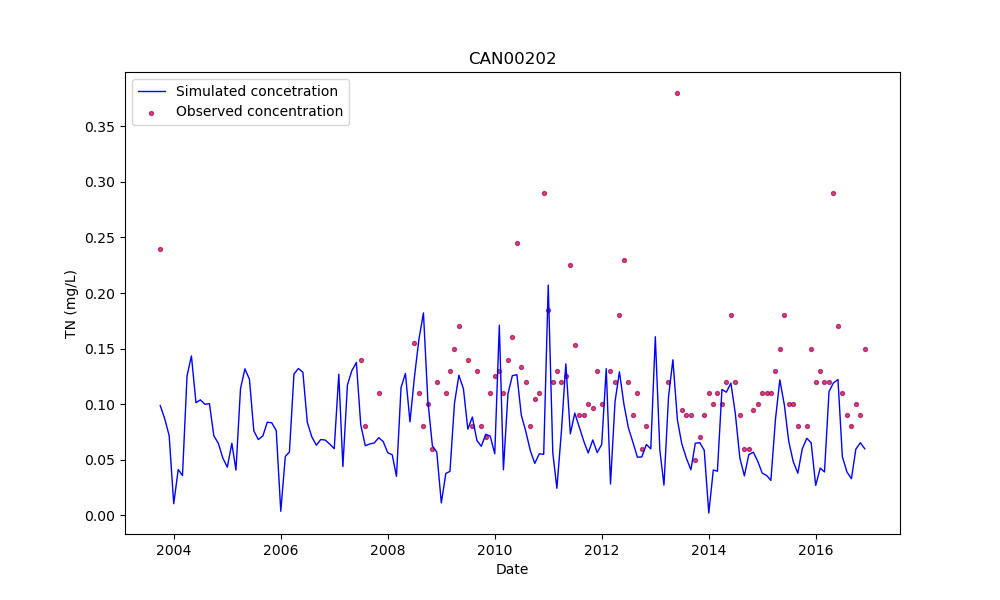


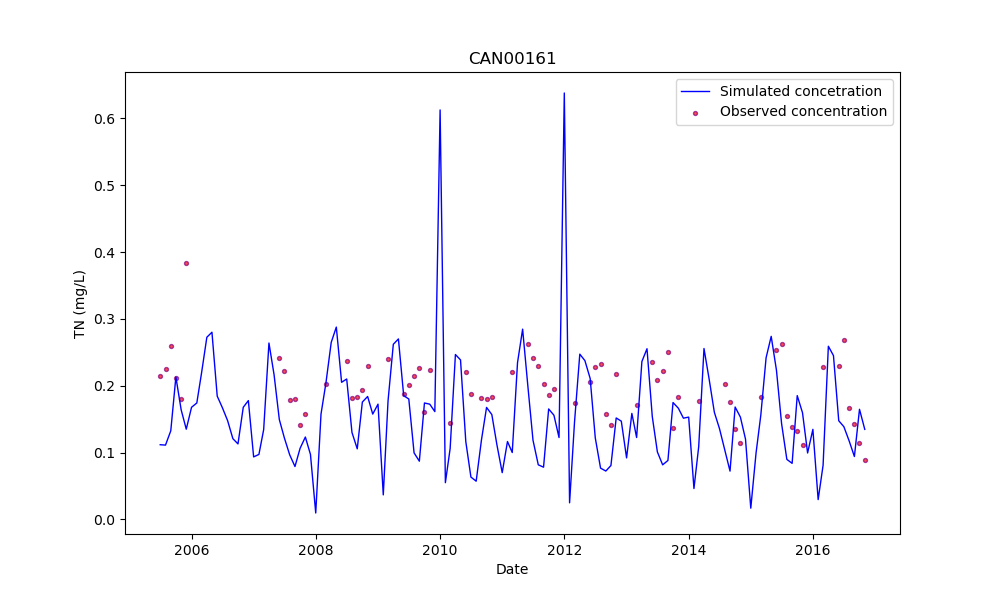


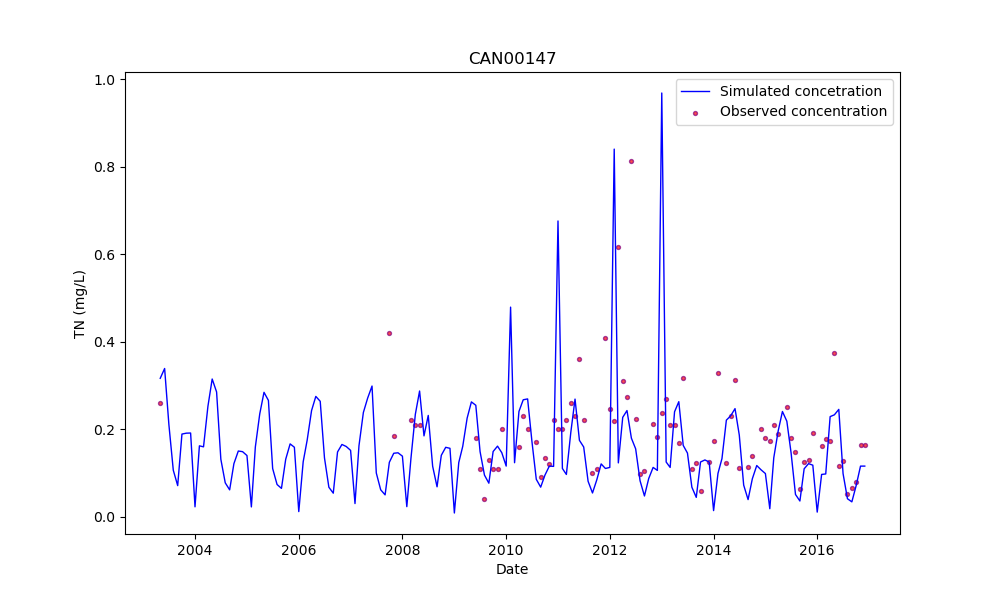


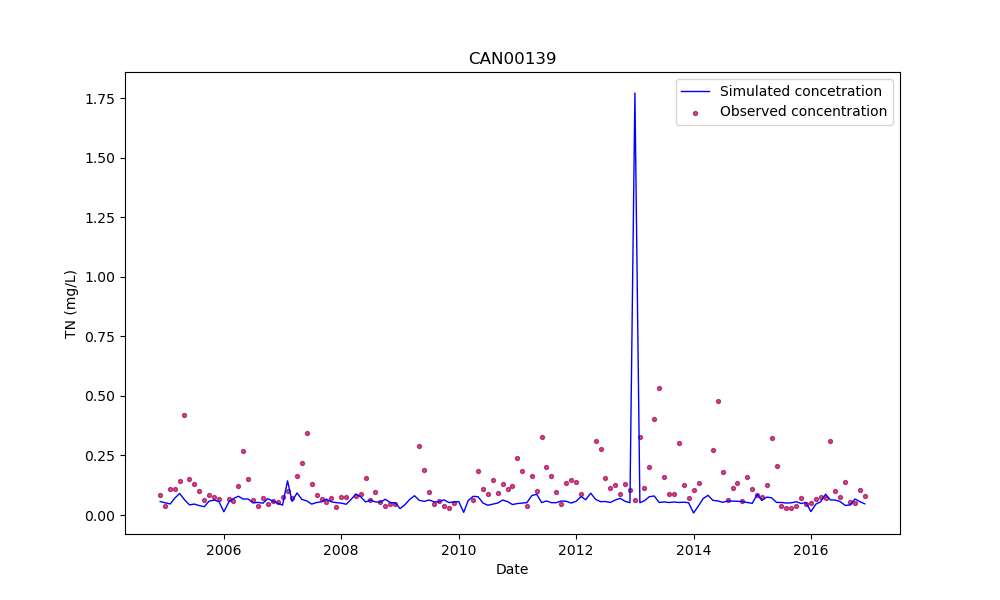


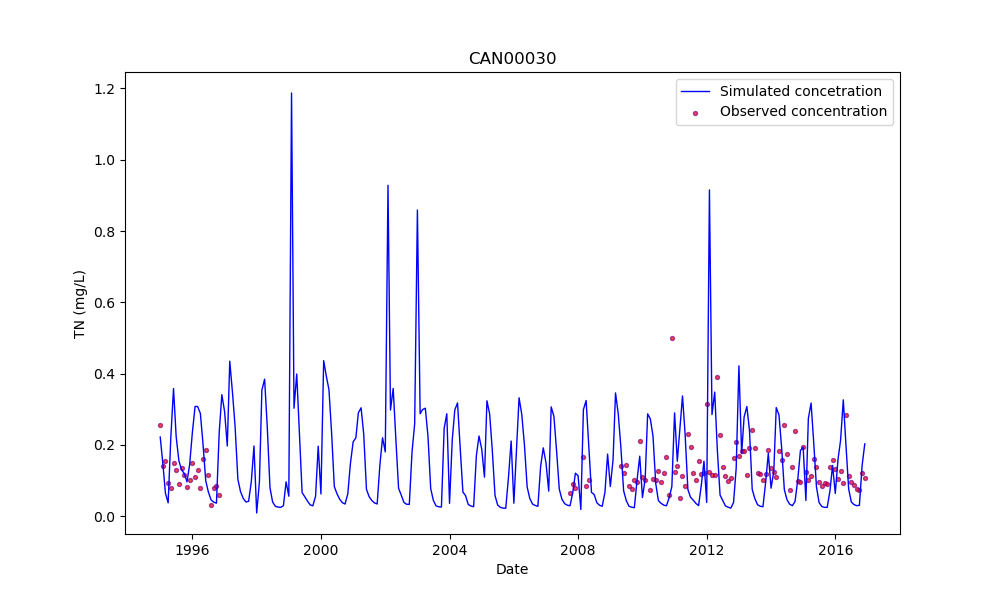


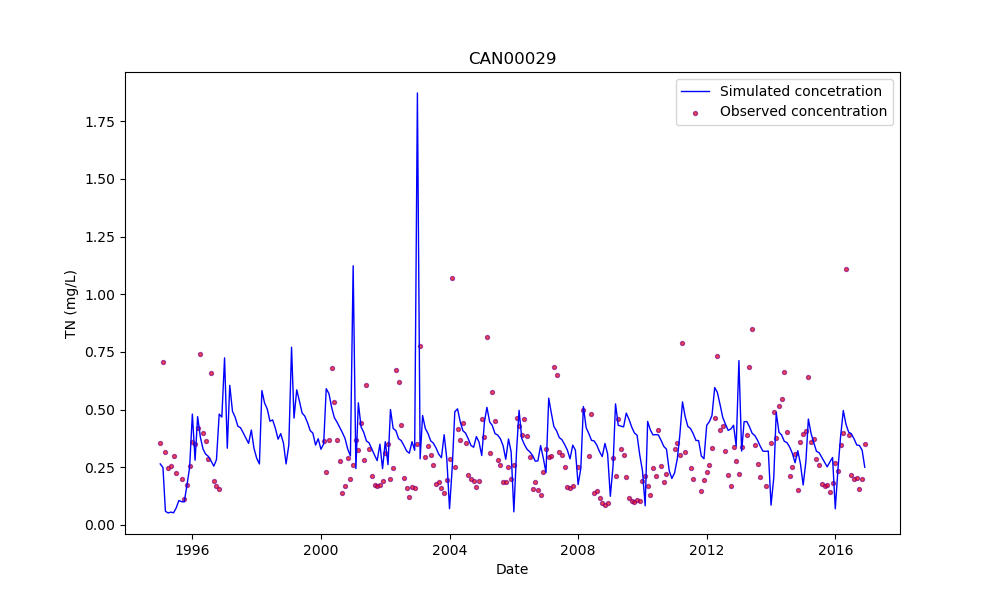


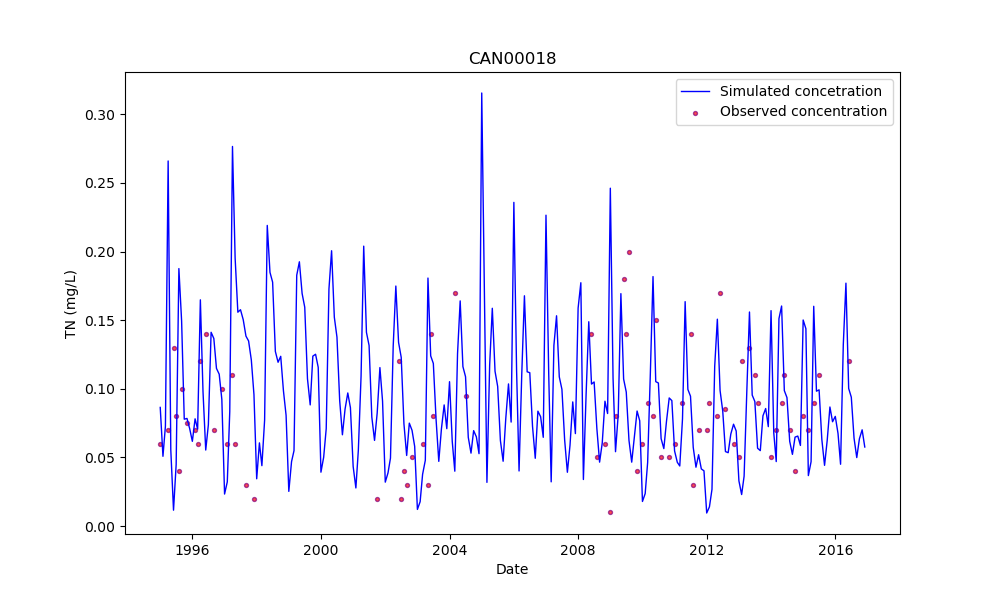


**S2: Time series for observed and simulated river concentrations for TP**


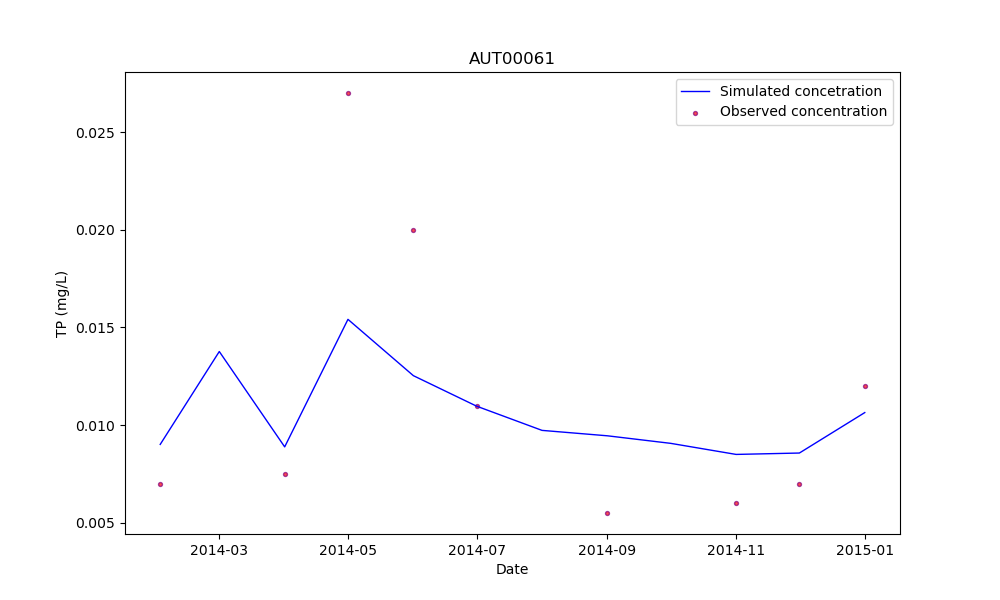


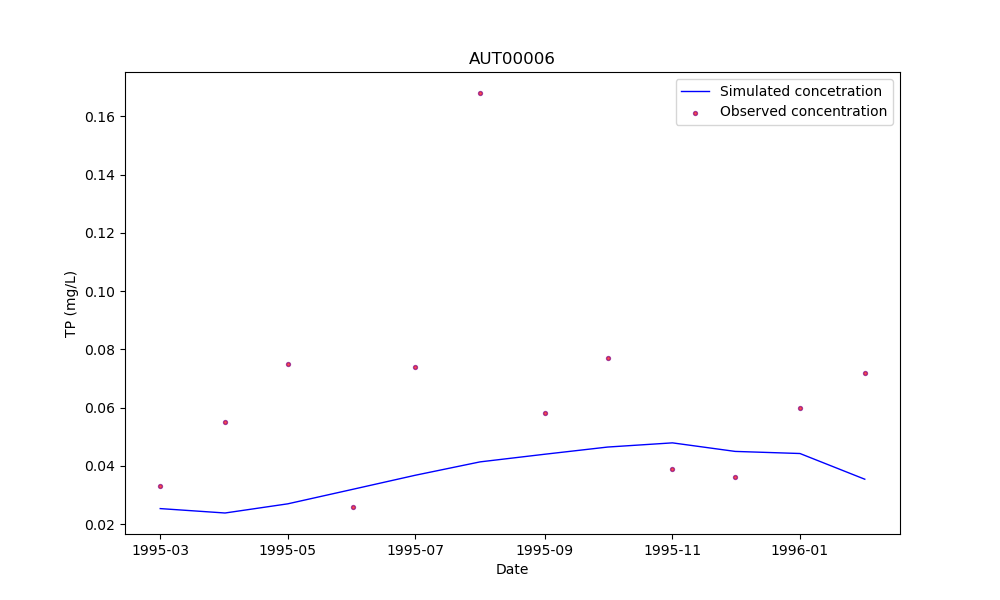


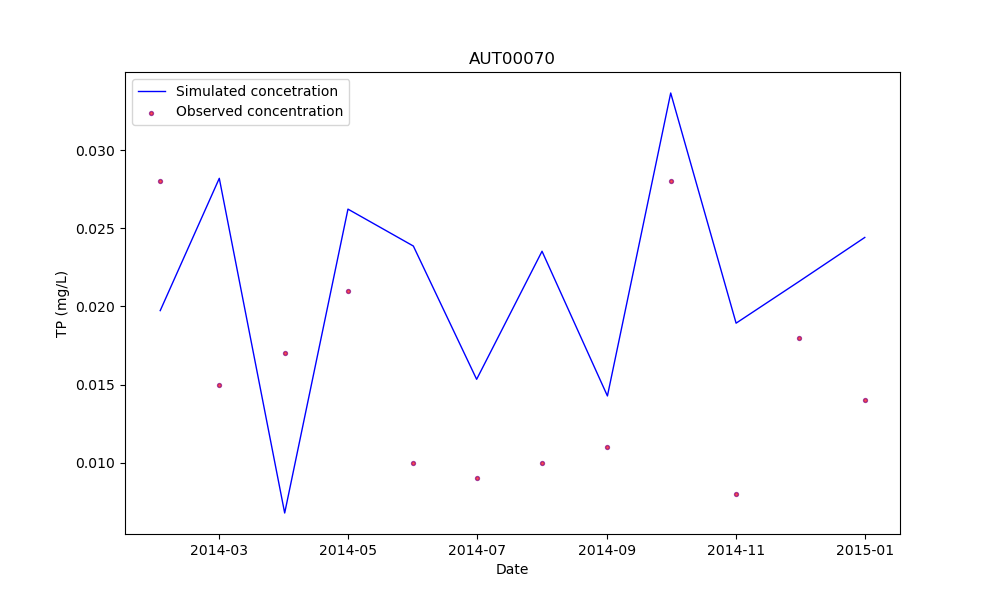


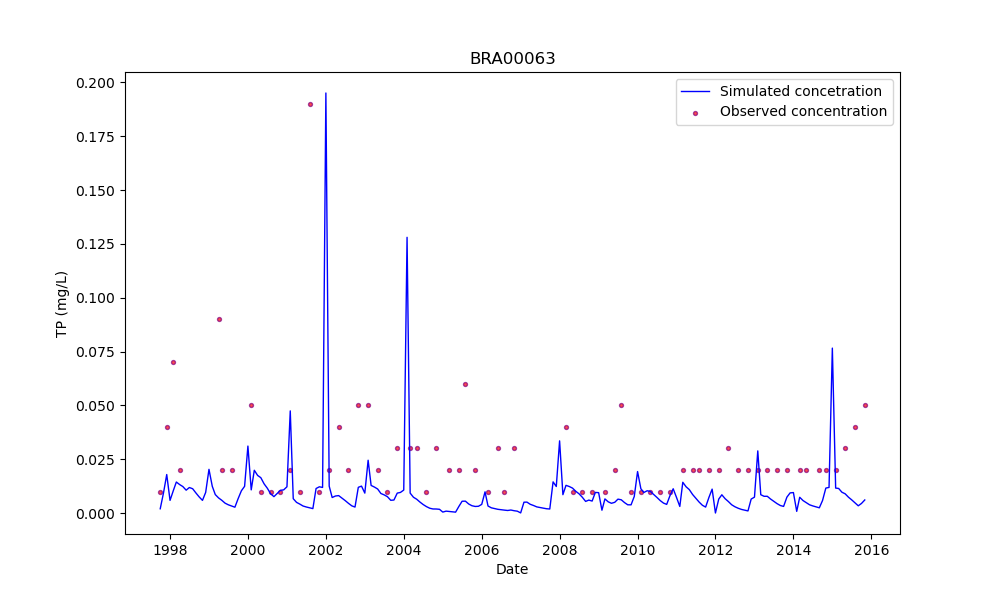


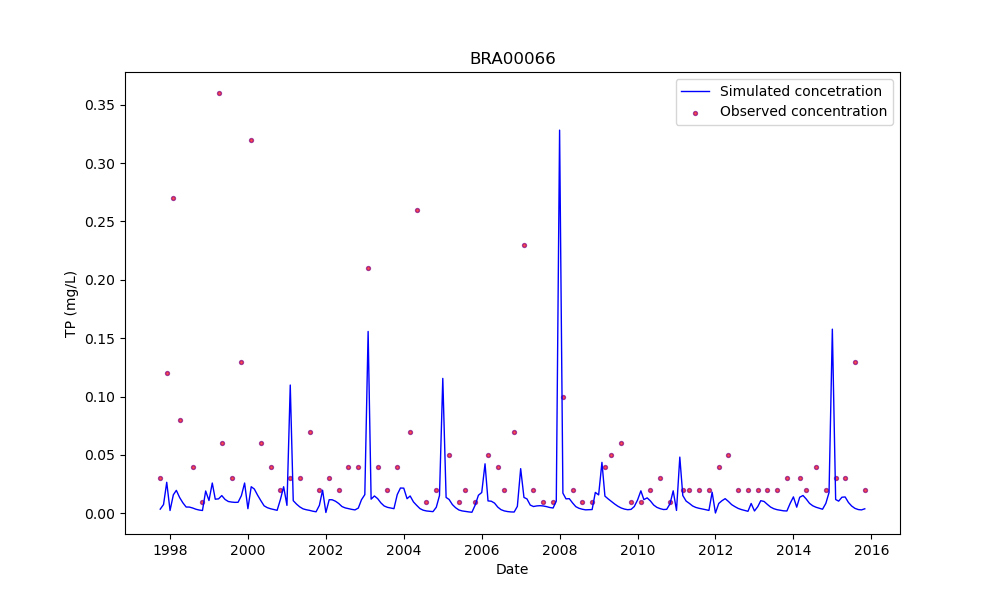


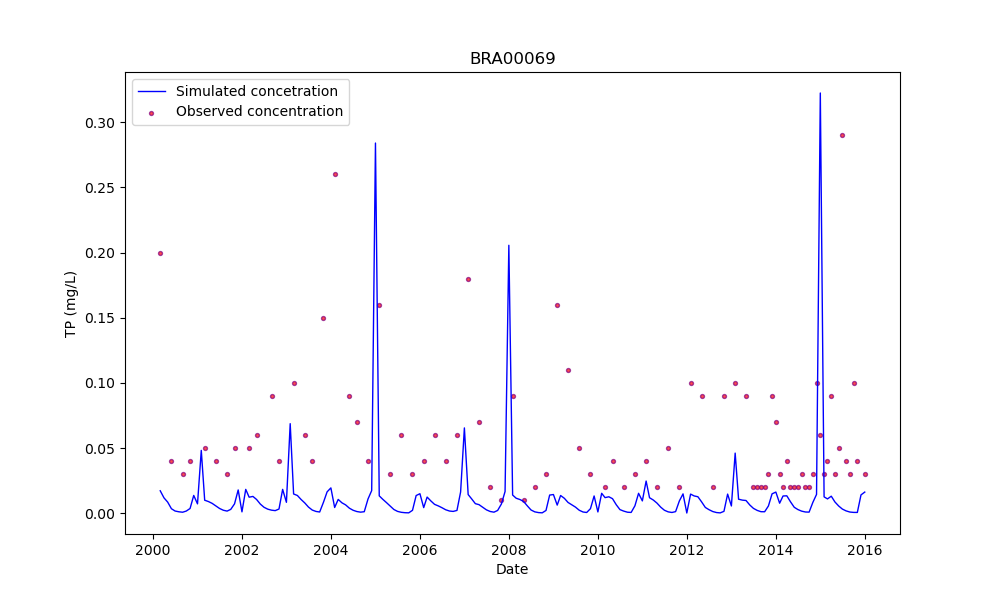


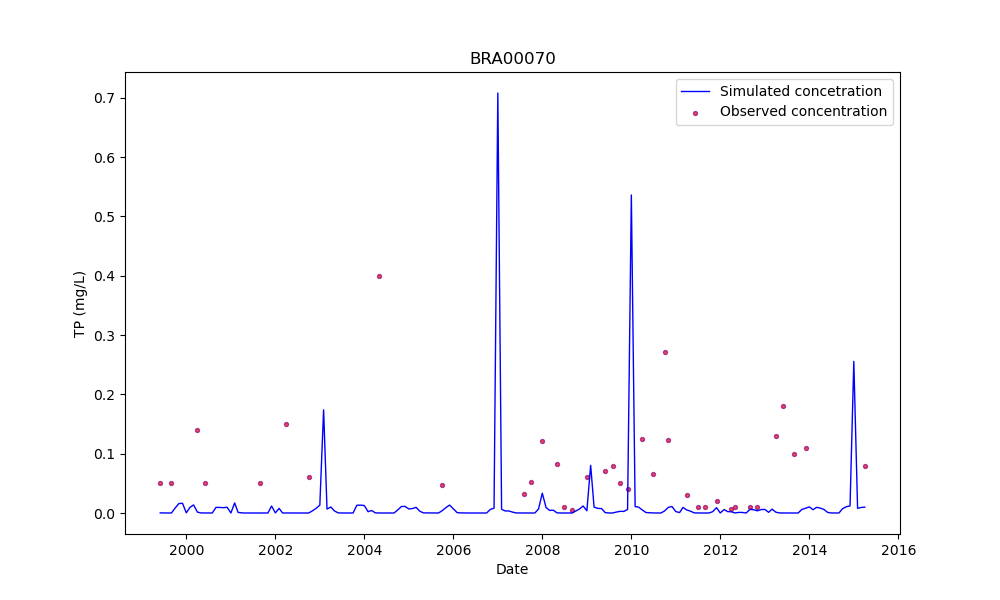


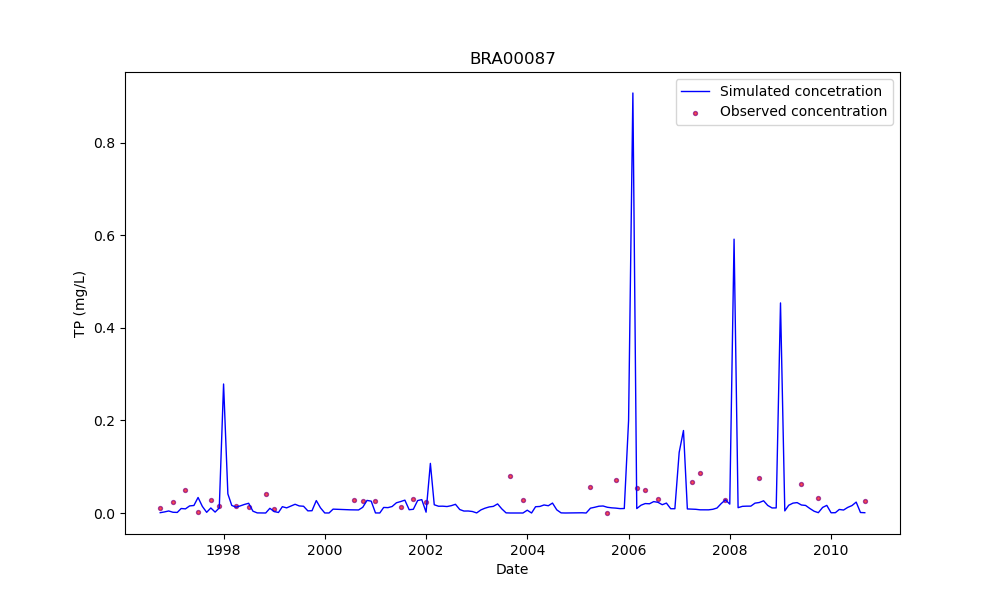


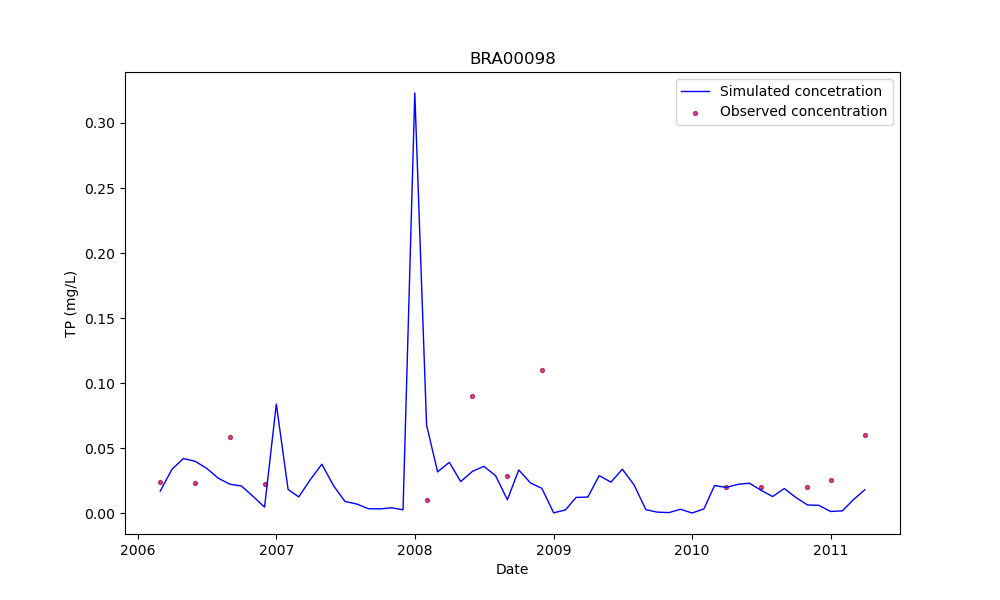


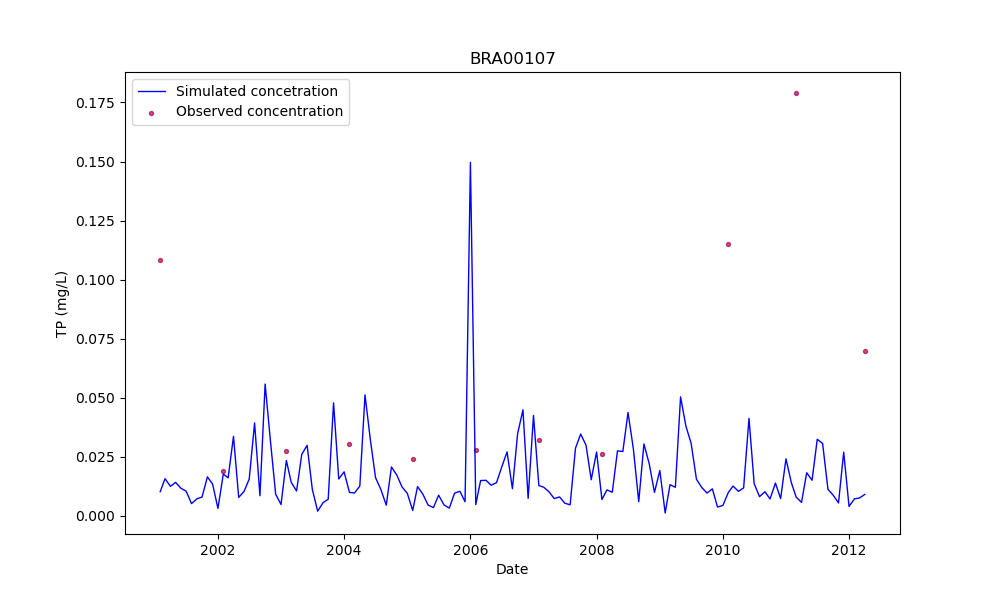


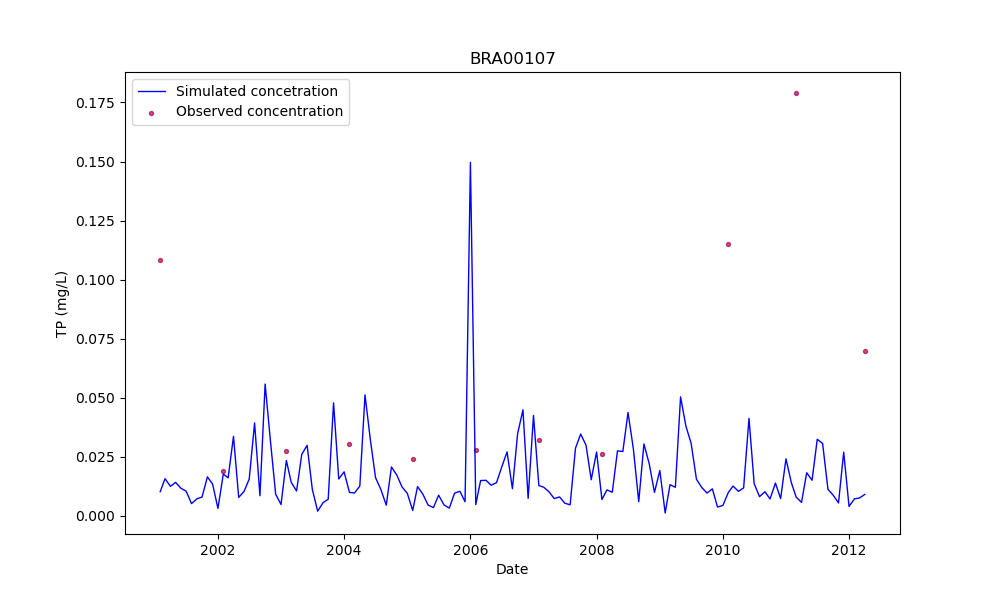


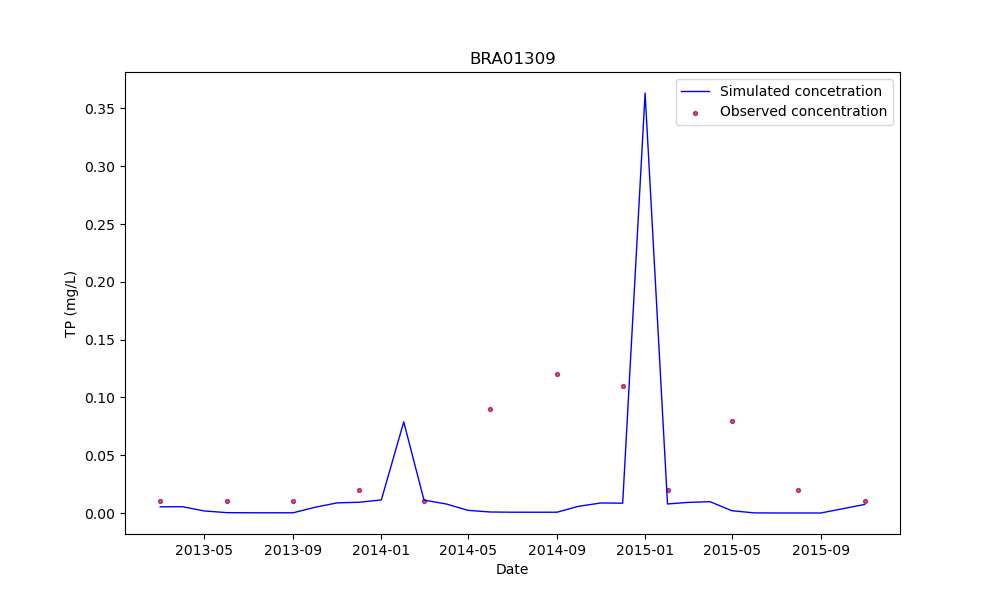


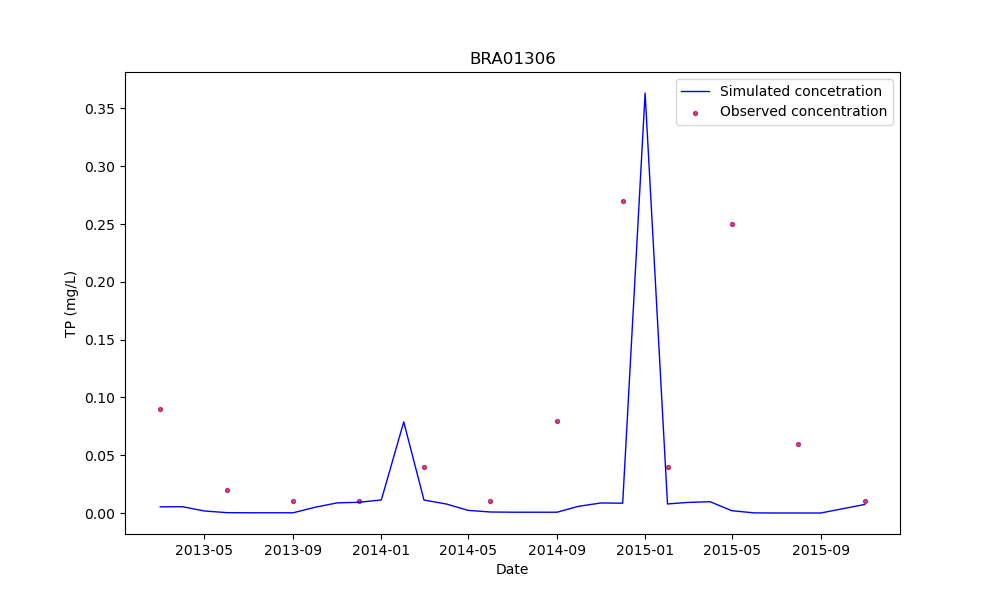


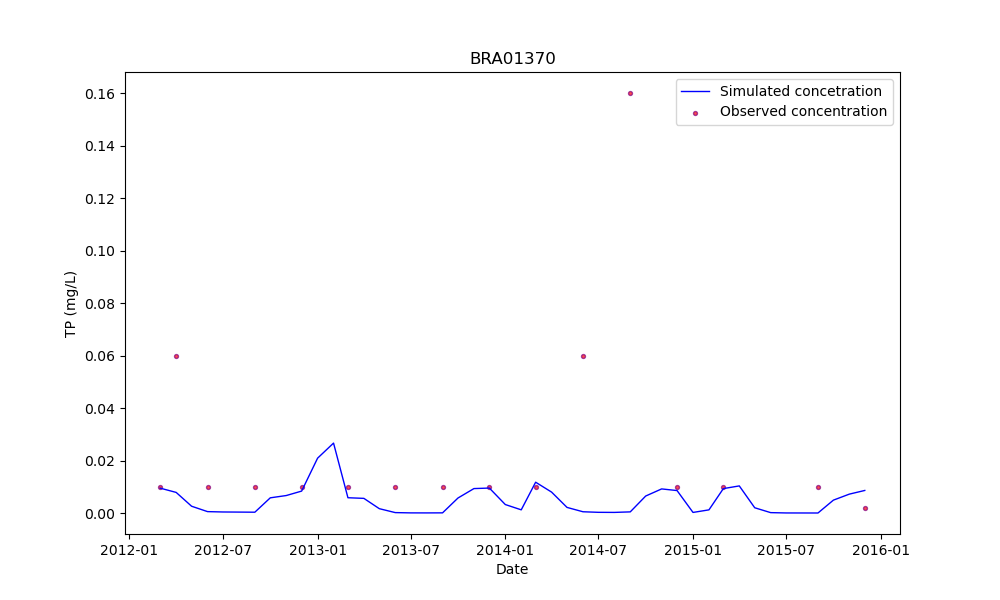


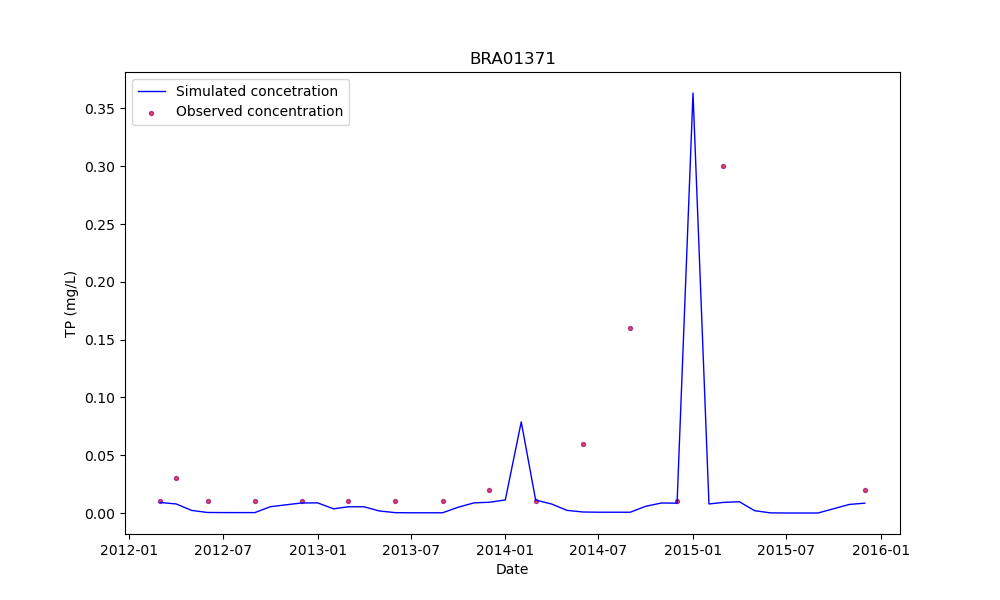


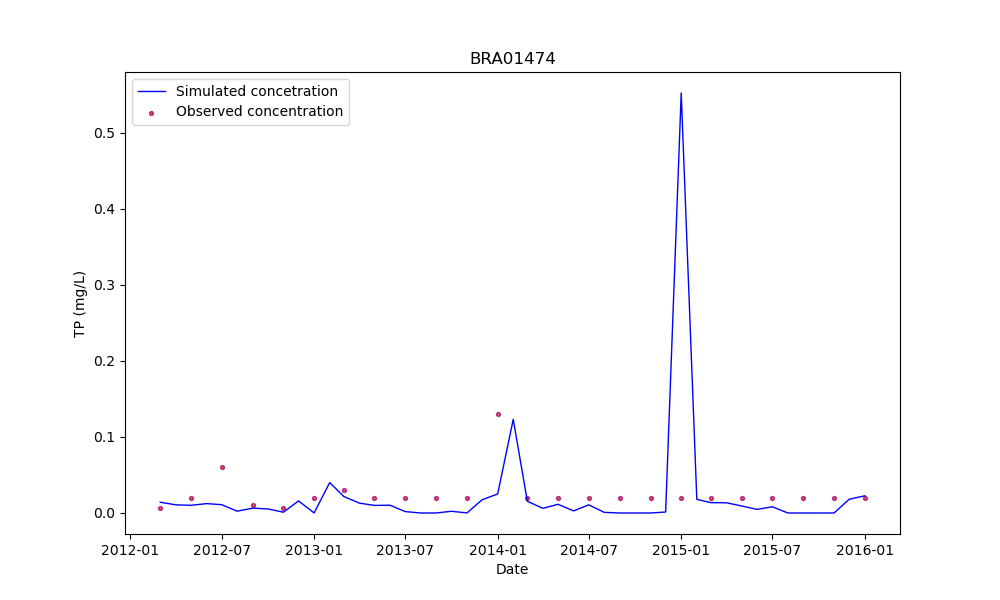


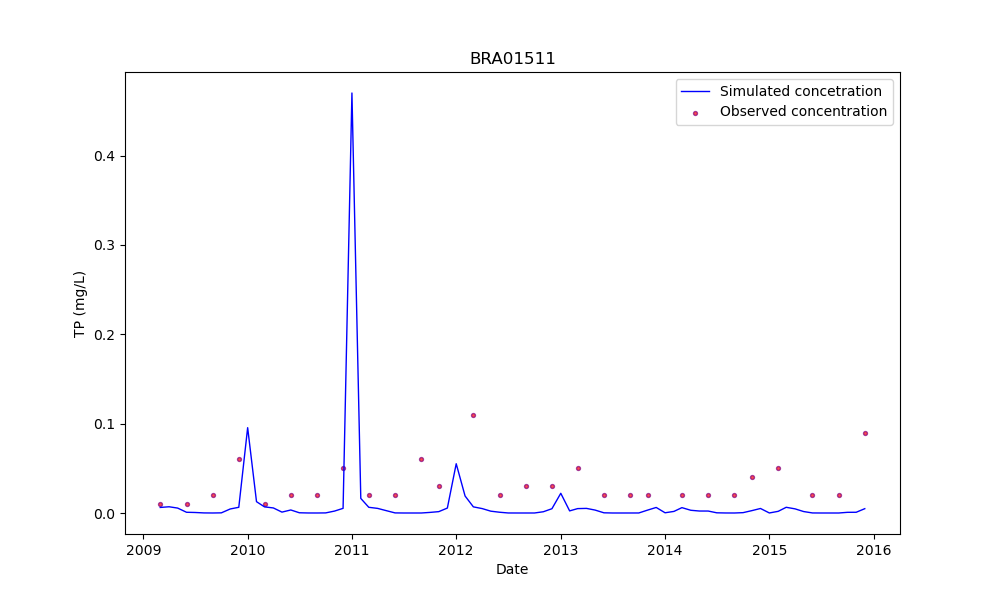


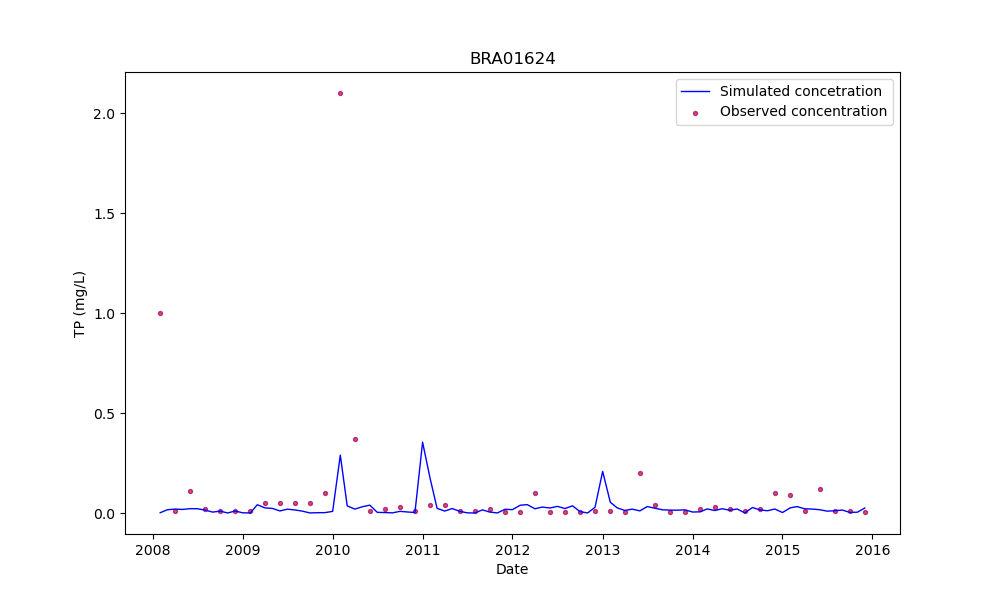


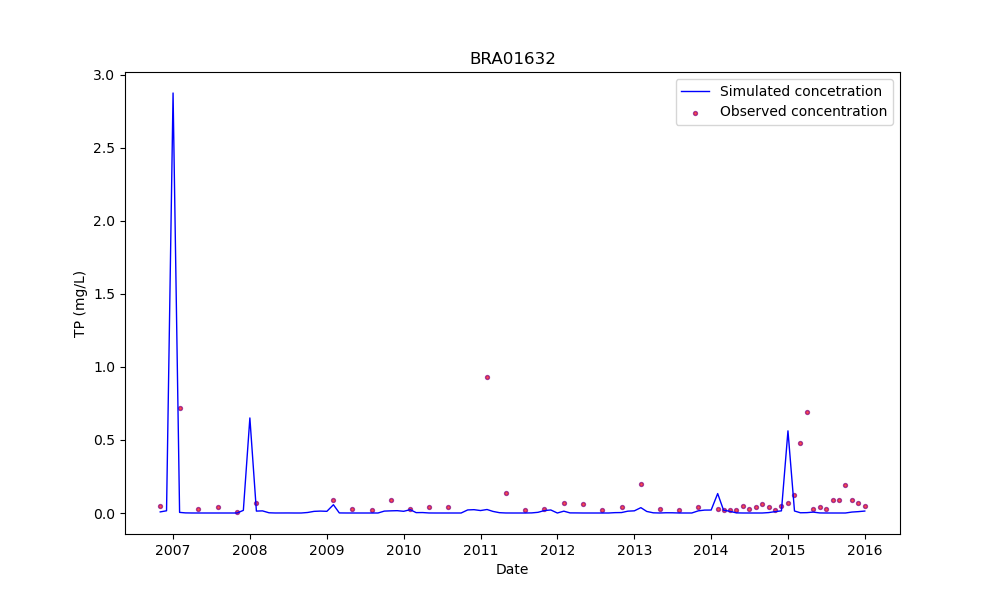


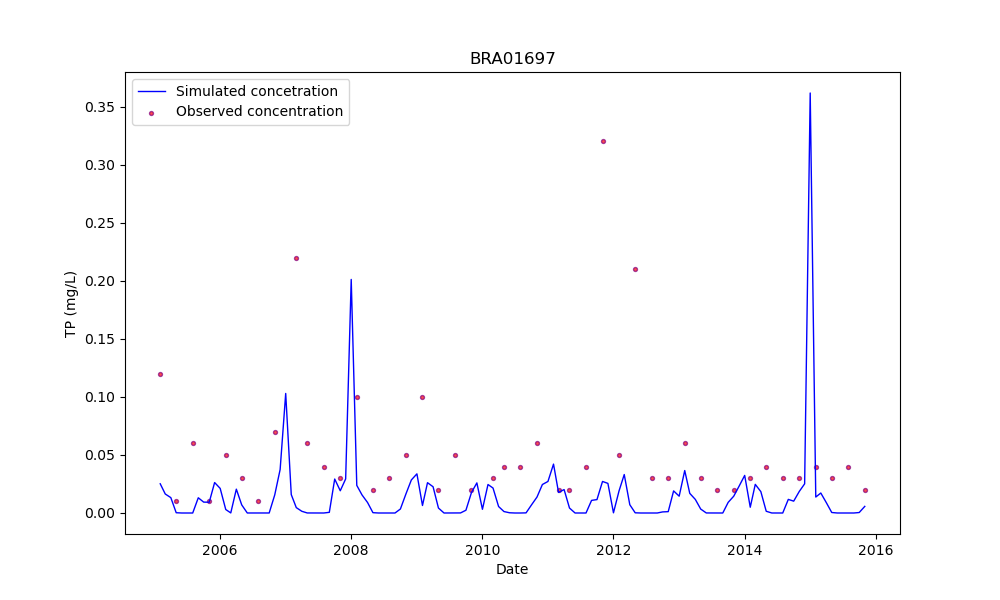


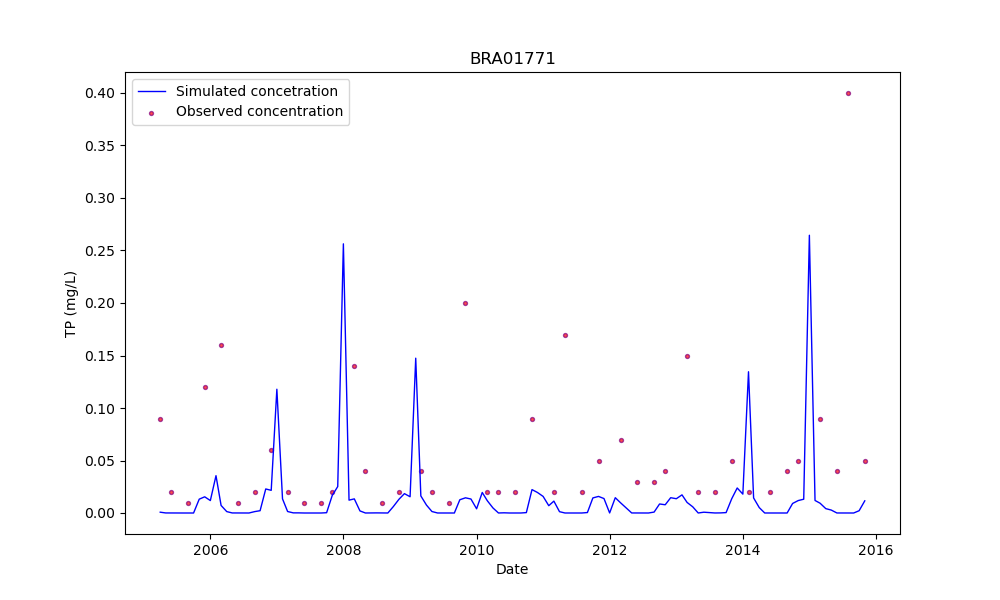


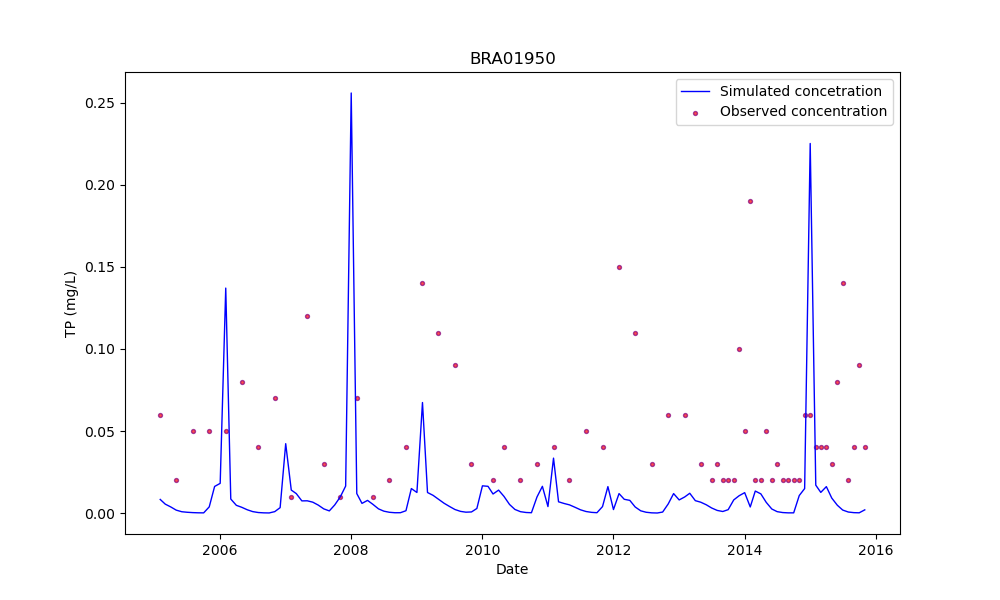


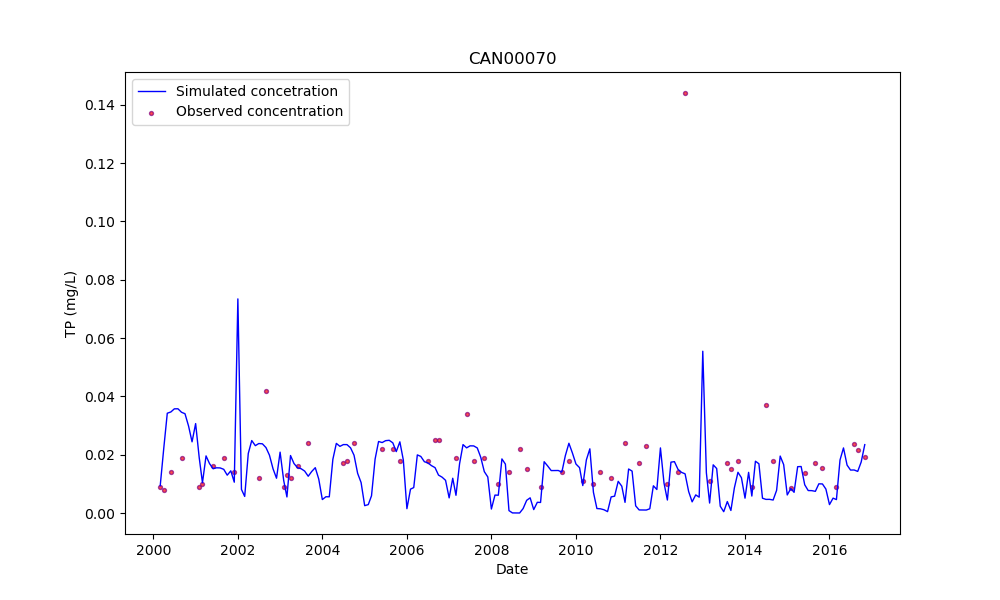


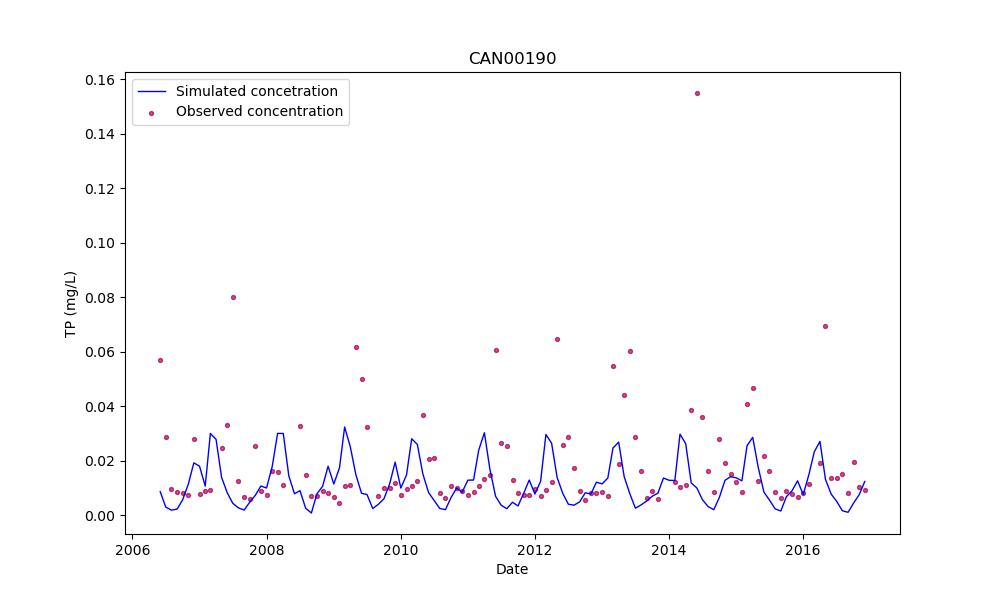


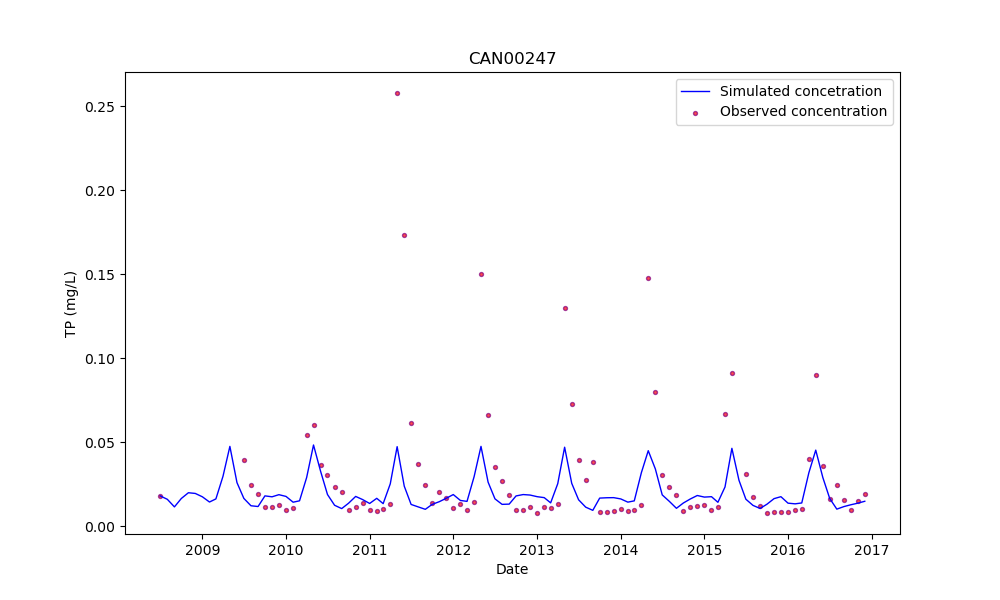


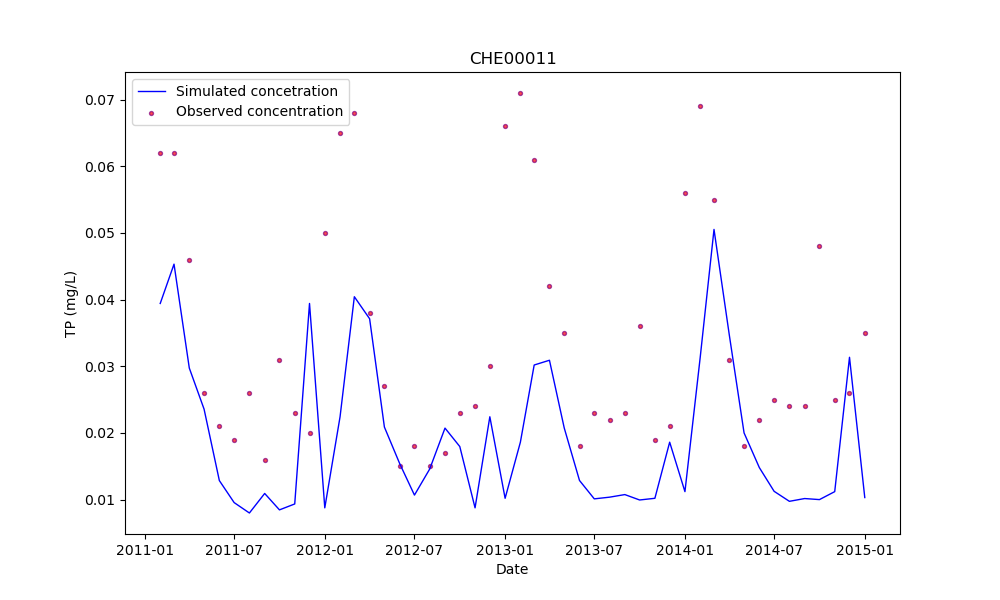


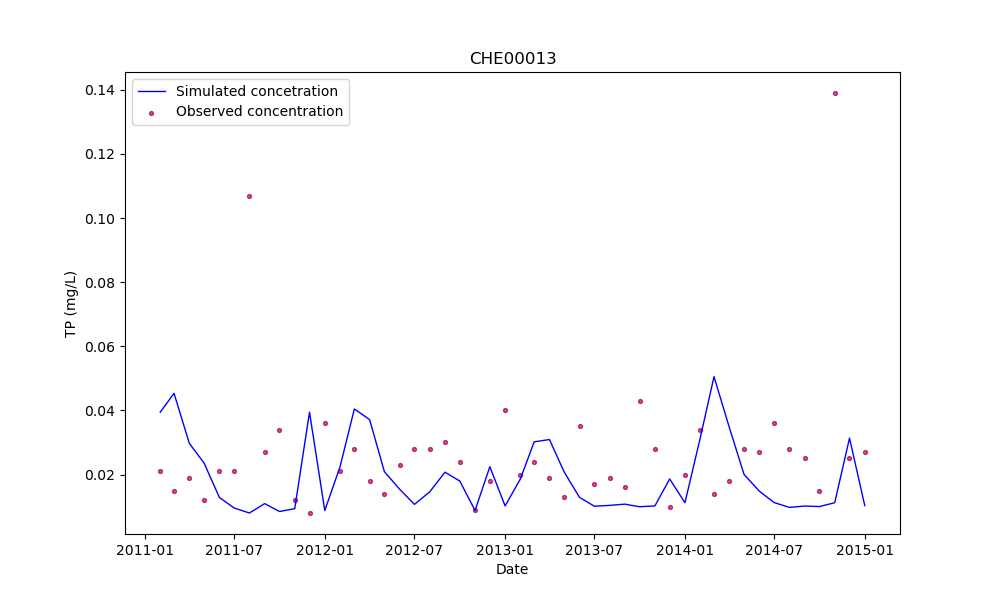


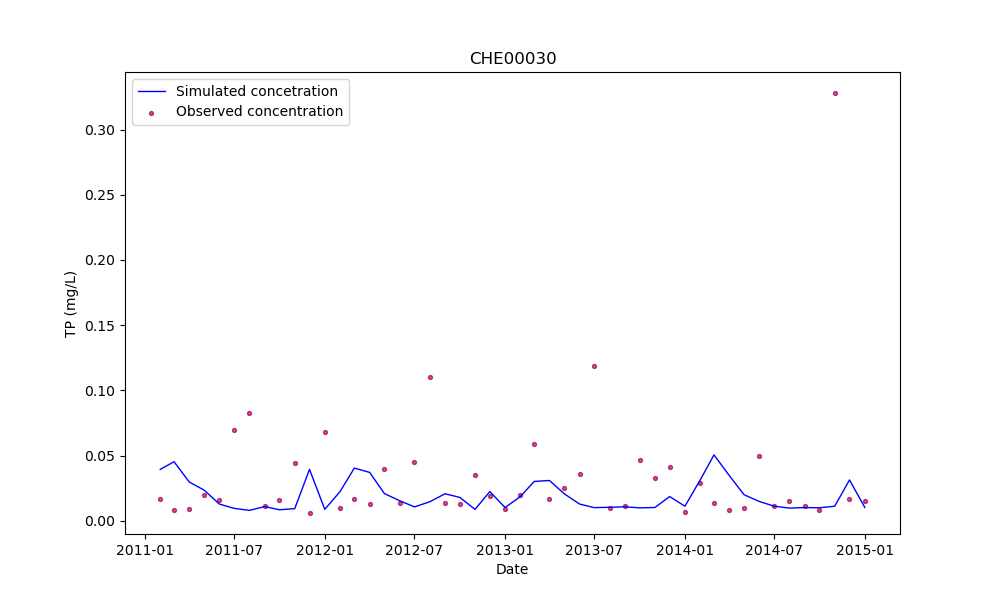


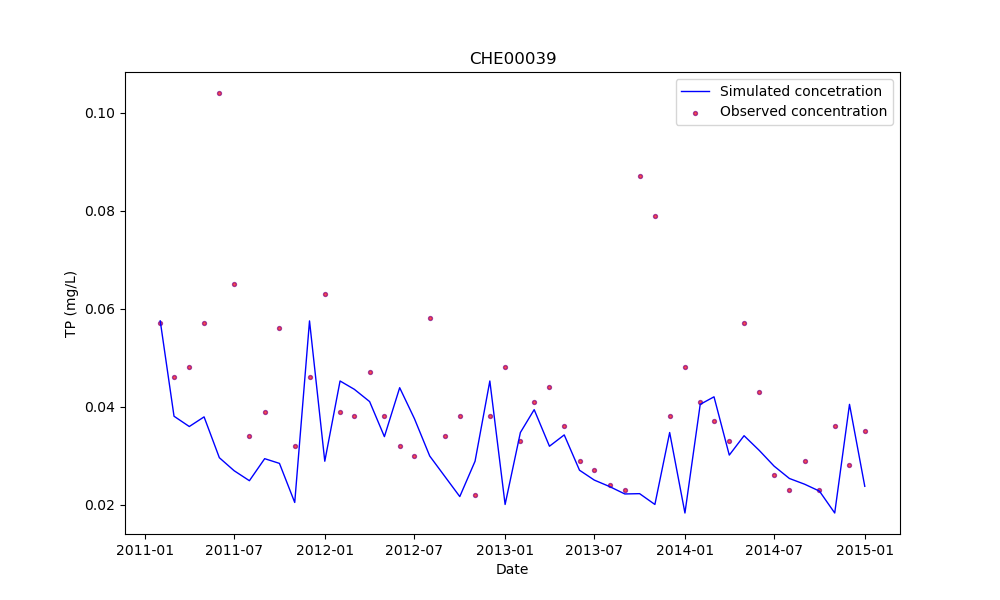


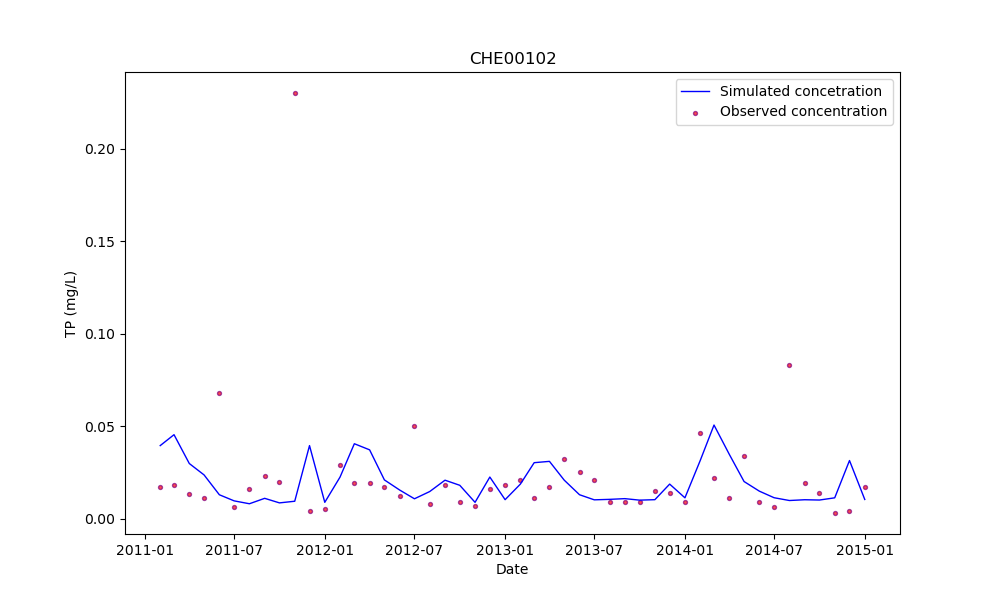


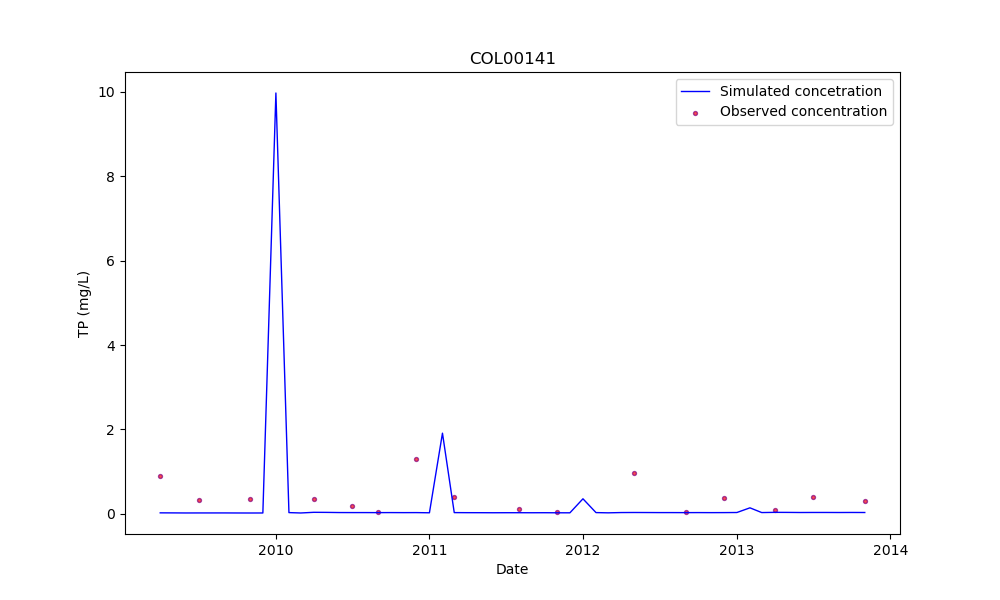


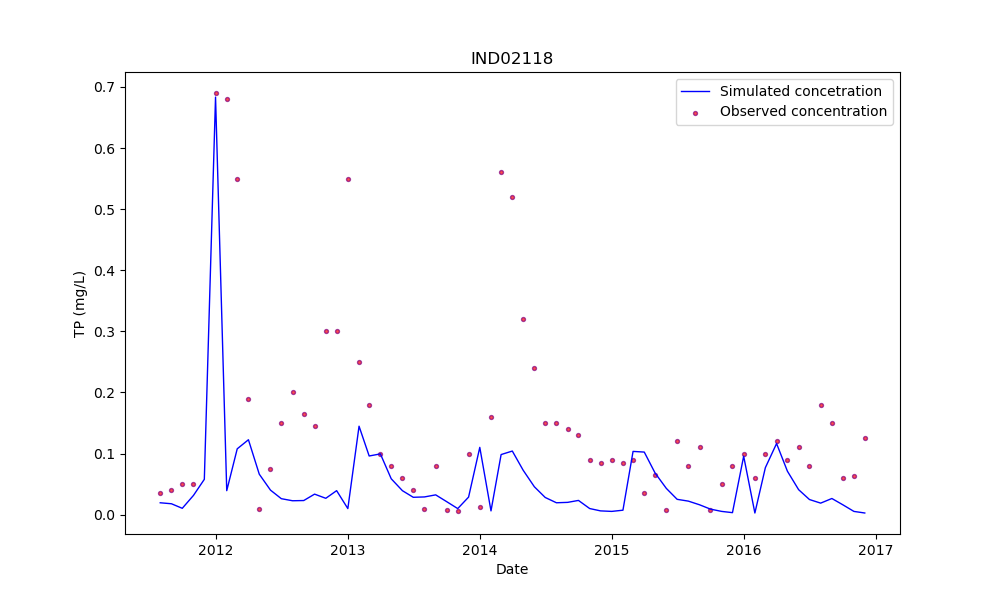


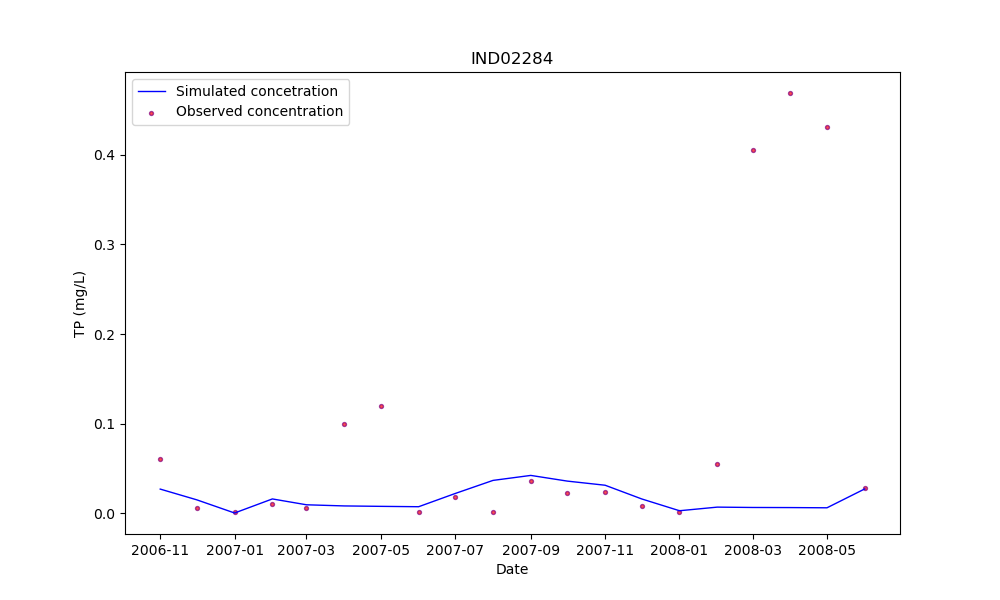


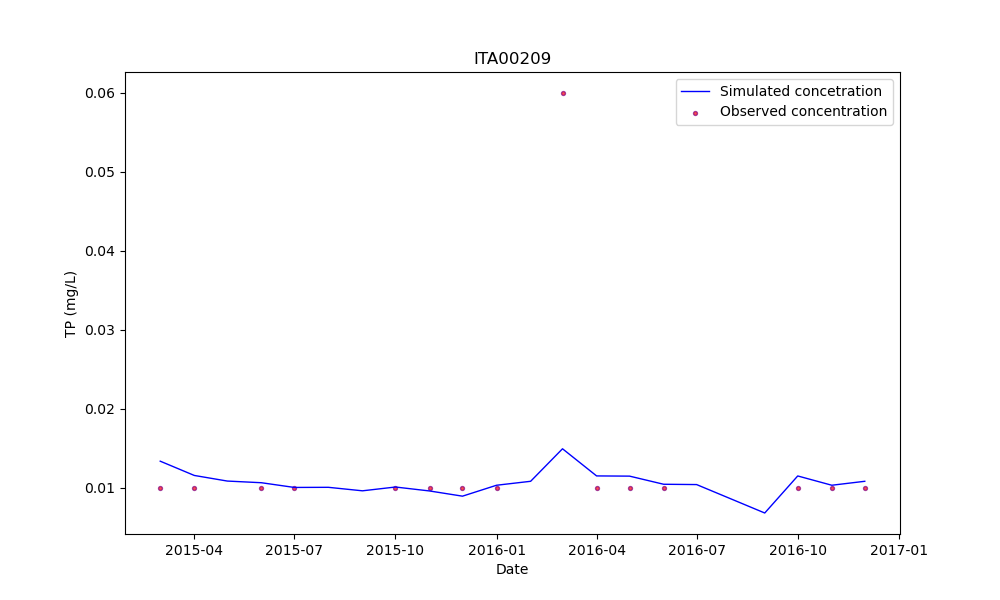


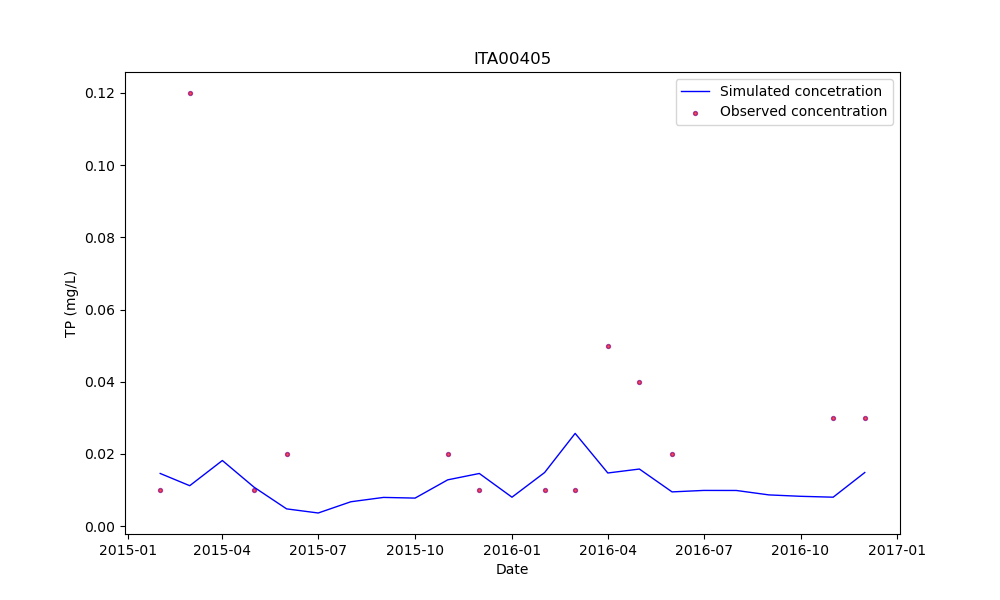


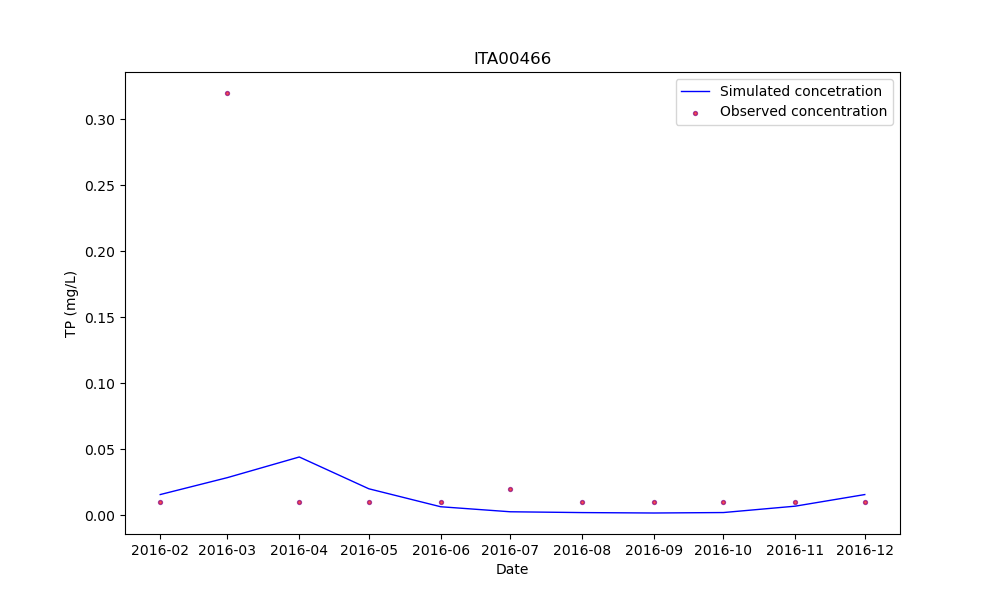


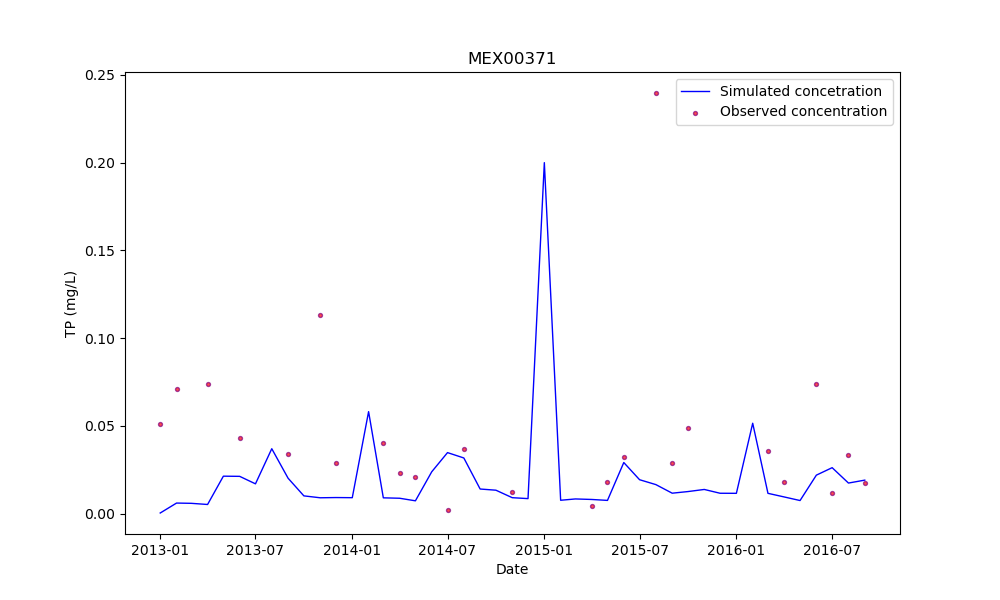


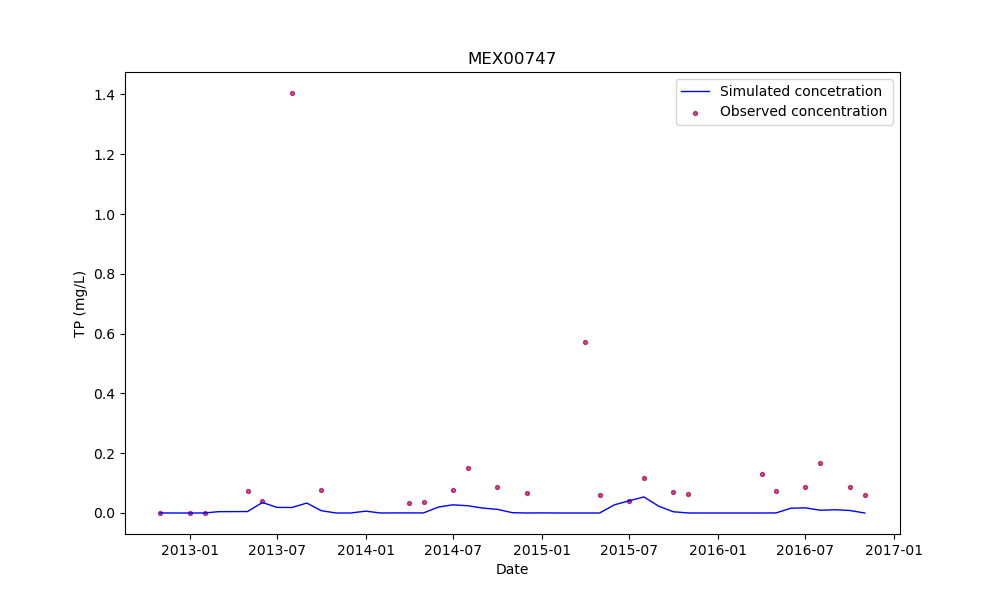


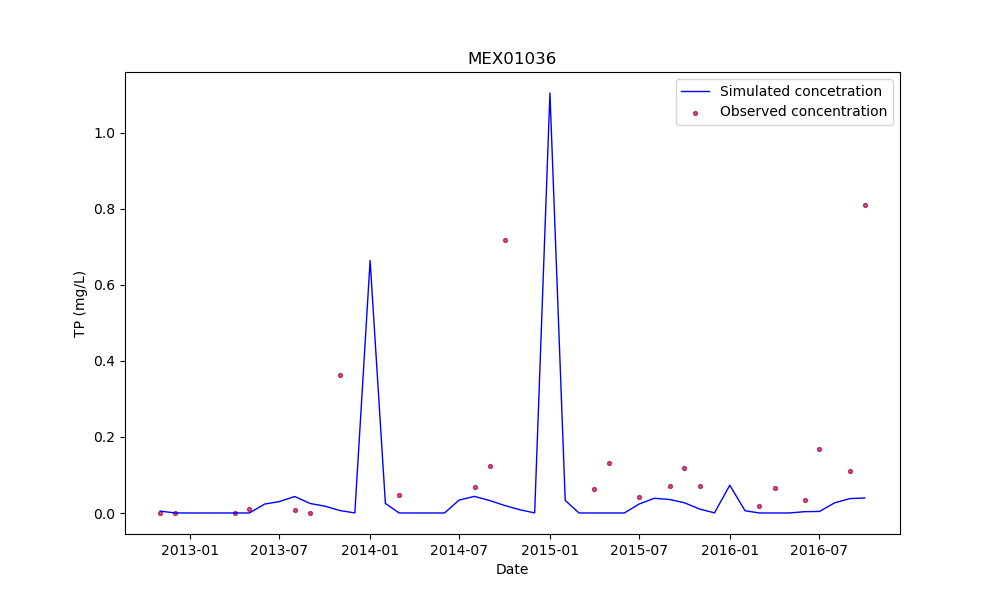


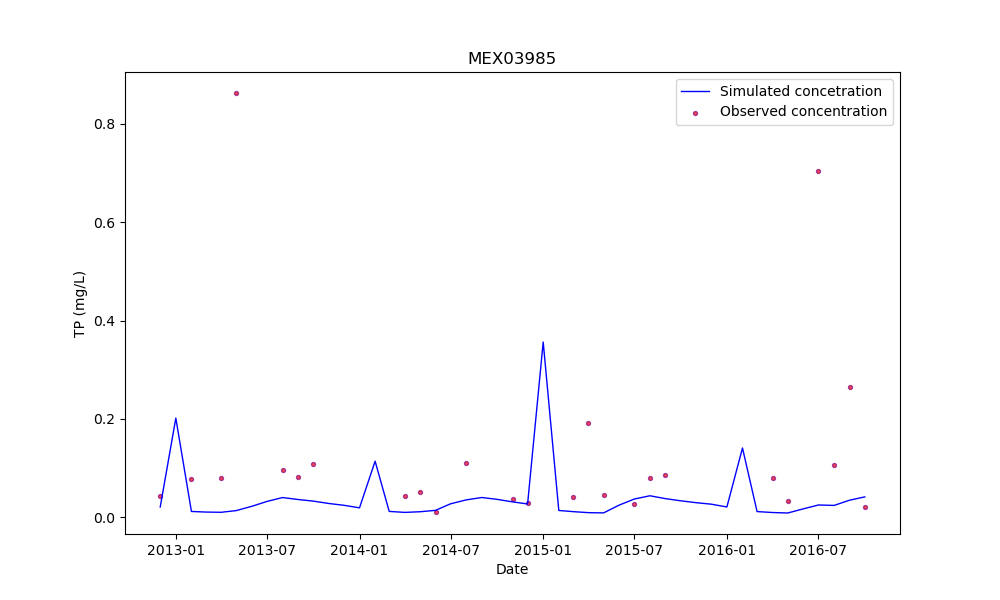


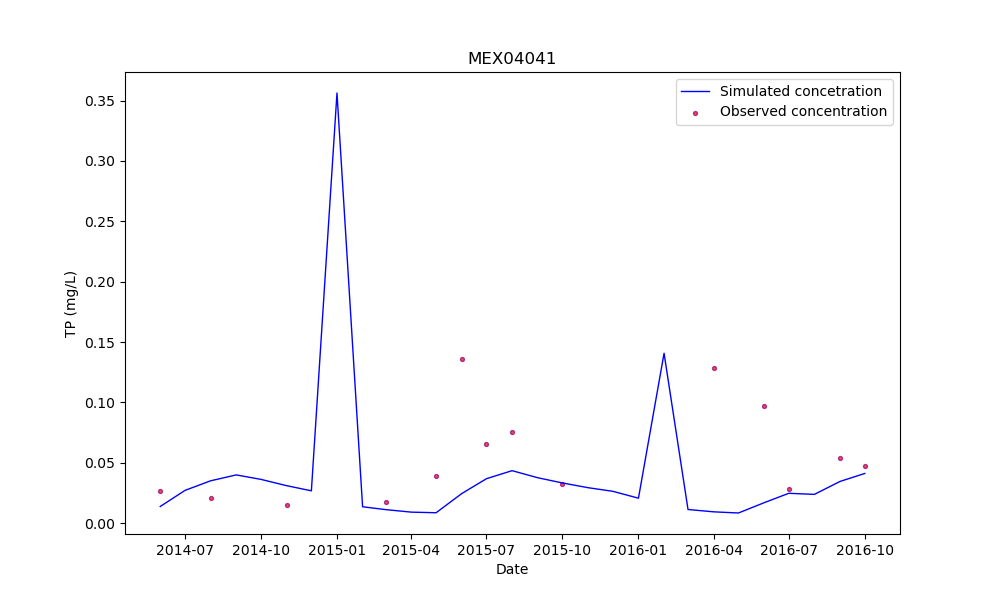


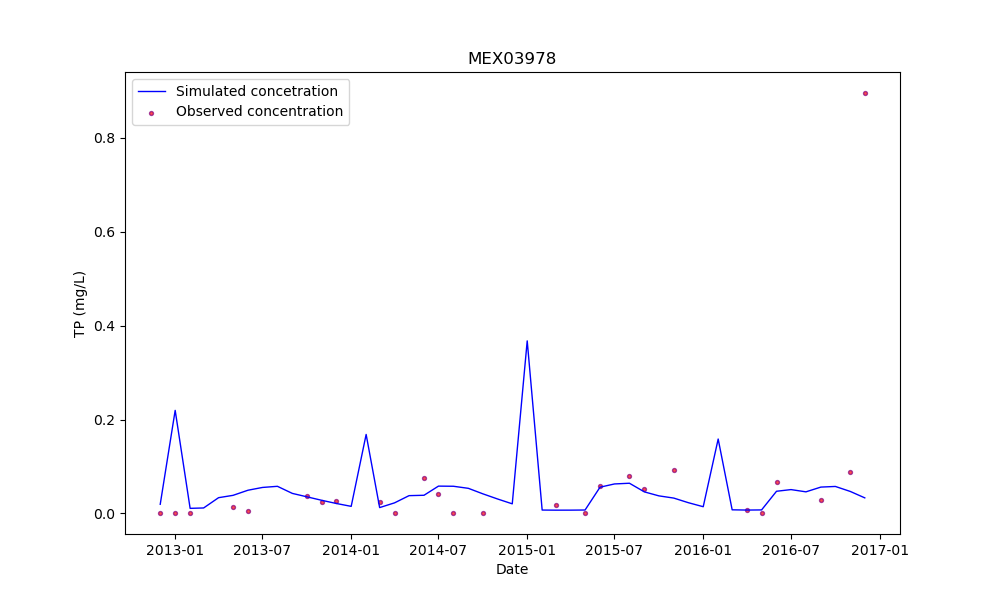


**S3: Irregularities in observational data**


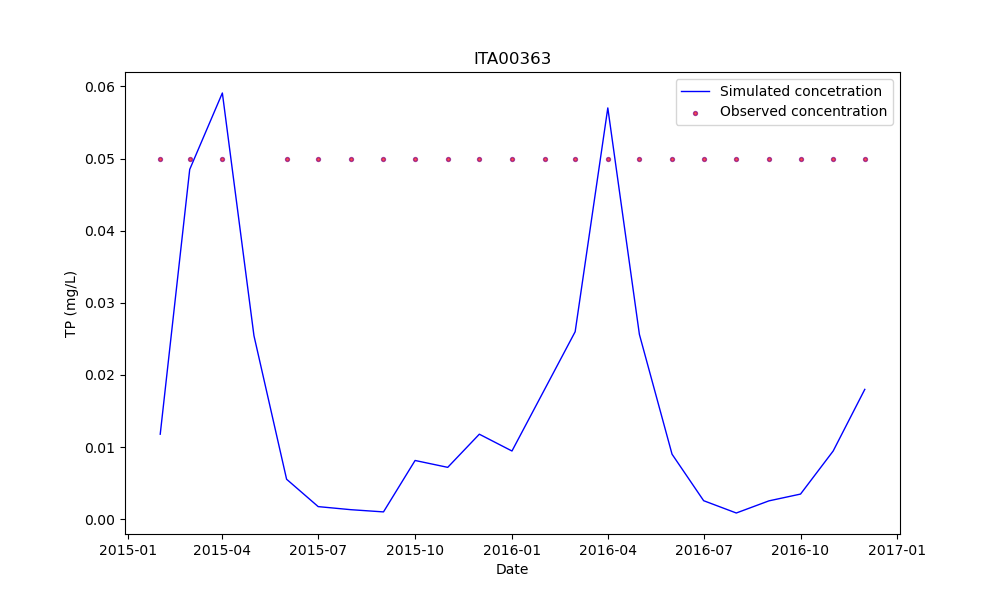

Supplement: Supplementary file 1 [file egusphere-2025-703-supplement.zip]
